# Supplementary material for: Enantiospecific synthesis of the heparanase inhibitor (+)-trachyspic acid and stereoisomers from a common precursor
Source: Royal Society of Chemistry journal article supplement (doi:10.1039/b708594j), 2007-01-01

# Enantiospecific Synthesis of the Heparanase Inhibitor (+)-Trachyspic Acid and Stereoisomers from a Common Precursor

Steven C. Zammit, Vito Ferro, Edward Hammond and Mark A. Rizzacasa\*

## *Electronic Supplementary Information*

### Contents

**Page 1** Experimental

**Page 10** Table 1:  $^1\text{H}$  and  $^{13}\text{C}$  NMR data for natural and synthetic trachyspic acid (**1**).

**Page 11** Table 2:  $^1\text{H}$  and  $^{13}\text{C}$  NMR data for natural and synthetic trachyspic acid trimethyl ester (**25**).

**Page 12**  $^1\text{H}$  NMR Spectrum of (–)-Trachyspic acid tri-*t*-butyl ester (**23**)

**Page 13**  $^{13}\text{C}$  NMR Spectrum of (–)-Trachyspic acid tri-*t*-butyl ester (**23**)

**Page 14**  $^1\text{H}$  NMR Spectrum of (–)-Trachyspic acid (*ent-1*)

**Page 15**  $^{13}\text{C}$  NMR Spectrum of (–)-Trachyspic acid (*ent-1*)

**Page 16**  $^1\text{H}$  NMR Spectrum of (–)-Trachyspic acid trimethyl ester (*ent-25*)

**Page 17**  $^{13}\text{C}$  NMR Spectrum of (–)-Trachyspic acid trimethyl ester (*ent-25*)

**Page 18**  $^1\text{H}$  NMR Spectrum of (–)-3-*epi*-Trachyspic acid tri-*t*-butyl ester (**31**)

**Page 19**  $^{13}\text{C}$  NMR Spectrum of (–)-3-*epi*-Trachyspic acid tri-*t*-butyl ester (**31**)

**Page 20**  $^1\text{H}$  NMR Spectrum of (+)-3-*epi*-Trachyspic acid (**28**)

**Page 21**  $^{13}\text{C}$  NMR Spectrum of (+)-3-*epi*-Trachyspic acid (**28**)

## Dimethyl 2-nonylmalonate **14**

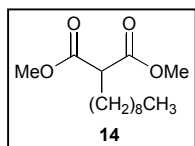

Dimethyl malonate (4.33 cm<sup>3</sup>, 37.8 mmol) and nonyl bromide (8.00 cm<sup>3</sup>, 41.6 mmol) were added to a solution of sodium methoxide in methanol [sodium metal (0.87 g, 37.8 mmol) in dry MeOH (27 cm<sup>3</sup>)]. The reaction mixture was heated under reflux for 16 h and the MeOH was removed under reduced pressure. Water and Et<sub>2</sub>O were added and the aqueous phase was acidified with 10% HCl. The aqueous phase was extracted with Et<sub>2</sub>O and the combined organic extracts were washed with water, brine, dried and concentrated. Purification by flash chromatography using 2.5-5% EtOAc/petrol as eluent gave **14** (8.44g, 86%) as a colourless oil:  $\nu_{\max}$  2927, 2856, 1759, 1737, 1436, 1344, 1154 cm<sup>-1</sup>;  $\delta_{\text{H}}$  (400 MHz) 0.85 (t,  $J$  = 6.8 Hz, 3H), 1.25 (br m, 14H), 1.87 (m, 2H), 3.33 (t,  $J$  = 7.2 Hz, 1H), 3.70 (s, 3H), 3.71 (s, 3H);  $\delta_{\text{C}}$  (100 MHz) 14.0, 22.6, 27.3, 28.8, 29.1, 29.2, 29.2, 29.4, 31.8, 51.6, 52.4, 169.9; HRMS (ESI): Calculated for C<sub>14</sub>H<sub>26</sub>O<sub>4</sub>Na [M+Na]<sup>+</sup> 281.1729, found 281.1725.

## 2-Nonylpropane-1,3-diol **15**

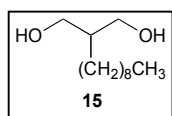

A solution of malonate **14** (6.00 g, 23.2 mmol) in dry Et<sub>2</sub>O (30 cm<sup>3</sup>) was added to a cooled suspension of LiAlH<sub>4</sub> (2.64 g, 69.7 mmol) in dry Et<sub>2</sub>O (70 cm<sup>3</sup>) at 0°C. The suspension was stirred at 0°C for 2 h, warmed to rt and stirred for another 2 h and 5

M aqueous NaOH was added until the grey coloured suspension turned white. The suspension was filtered and the filtrate concentrated to give the diol **15** (4.18 g, 89%) as a colourless gum pure enough for the next step:  $\nu_{\max}$  3371, 2928, 2856, 1467, 1029 cm<sup>-1</sup>;  $\delta_{\text{H}}$  (400 MHz) 0.89 (t,  $J$  = 6.8 Hz, 3H), 1.24 (br s, 16H), 1.72 (sept,  $J$  = 3.6 Hz, 1H), 2.27 (br s, 2H), 3.60 (dd,  $J$  = 10.4, 7.6 Hz, 2H), 3.76 (dd,  $J$  = 10.4, 3.6 Hz, 2H);  $\delta_{\text{C}}$  (100 MHz) 14.1, 22.6, 27.2, 27.7, 29.3, 29.5, 29.6, 29.9, 31.8, 41.9, 66.2, 66.2; HRMS (ESI): Calculated for C<sub>12</sub>H<sub>26</sub>O<sub>2</sub>Na [M+Na]<sup>+</sup> 225.1830, found 225.1826.

## Silyl ether **16**

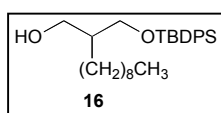

A solution of the diol **15** (4.18 g, 20.7 mmol) in dry THF (30 cm<sup>3</sup>) was added via cannula to a suspension of NaH (60% dispersion in oil, 0.83 g, 20.7 mmol) in dry THF (45 cm<sup>3</sup>). The suspension was cooled to 0°C and TBDPSCl (5.38 cm<sup>3</sup>,

20.7 mmol) was added and the mixture was stirred at 0°C for 1 h, then warmed to rt and stirred for another 1 h. Water was added and the aqueous phase was extracted with Et<sub>2</sub>O. The combined organic extracts were washed with water, brine, dried and concentrated. The crude product was purified by flash chromatography with 5% EtOAc/petrol as eluent to afford **16** (8.29 g, 91%) as a colourless oil:  $\nu_{\max}$  3401, 2928, 2856, 1428, 1113 cm<sup>-1</sup>;  $\delta_{\text{H}}$  (400 MHz) 0.89 (t,  $J$  = 7.2 Hz, 3H), 1.07

(s, 9H), 1.24 (br s, 16H), 1.78 (m, 1H), 2.75 (br s, 1H), 3.62-3.72 (m, 2H), 3.79 (dd,  $J = 10.4, 4.0$  Hz, 2H), 7.43 (m, 4H), 7.70 (m, 4H);  $\delta_c$  (100 MHz) 14.1, 19.2, 22.7, 26.5, 26.8, 27.1, 27.6, 29.3, 29.5, 29.5, 29.8, 31.9, 40.1, 66.4, 67.5, 127.6, 127.7, 129.5, 129.8, 132.0, 133.0, 135.5, 135.6; HRMS (ESI): Calculated for  $C_{28}H_{44}O_2SiNa$   $[M+Na]^+$  463.3008, found 463.3007.

## Lactols 2

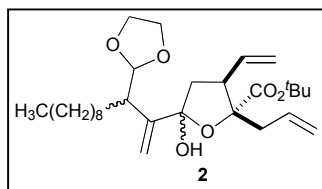

A solution of  $t$ BuLi in hexanes (168  $\mu$ L, 1.7 M, 0.286 mmol) was added dropwise to a solution of bromoalkene **4** (57 mg, 0.179 mmol) in dry  $Et_2O$  (1.0  $cm^3$ ) and dry hexane (0.8  $cm^3$ ) at  $-78^\circ C$  under argon. The resulting solution was stirred at  $-78^\circ C$  for 5 min and a solution of lactone **3** (17 mg, 0.0674 mmol) in  $Et_2O$  (0.5  $cm^3$ ) and hexane (0.4  $cm^3$ ) was added dropwise via cannula. The mixture was stirred at  $-78^\circ C$  for 1 h, warmed to  $0^\circ C$  and stirred for another 30 min and quenched with water. The aqueous phase was extracted with  $Et_2O$  and the combined organic extracts were washed with water, brine, dried and concentrated. Purification of the crude product by flash chromatography with 10% EtOAc/petrol as eluent afforded **2** (18 mg, 54%) as a mixture of anomers:  $\nu_{max}$  3505, 2926, 2855, 1719, 1369, 1148  $cm^{-1}$ ;  $\delta_H$  (400 MHz) 0.86 (t,  $J = 7.2$  Hz, 3H), 1.21 (br s, 14H), 1.46 (s, 9H), 1.63 (m, 2H), 2.30 (m, 1H), 2.46 (m, 1H), 2.96-3.13 (m, 3H), 3.75-3.91 (m, 4H), 4.79 (d,  $J = 5.0$  Hz, 0.5H), 4.82 (d,  $J = 5.0$  Hz, 0.5H), 5.07-5.13 (m, 4H), 5.62-5.78 (m, 2H), 5.82 (s, 1H), 6.13 (s, 1H);  $\delta_c$  (100 MHz) 14.1, 22.7, 27.0, 27.1, 27.9, 28.9, 29.2, 29.3, 29.5, 29.5, 29.5, 29.7, 31.9, 37.9, 38.1, 42.3, 42.9, 47.1, 47.2, 64.7, 64.7, 64.9, 78.5, 78.5, 83.1, 105.9, 106.1, 118.7, 119.0, 119.1, 125.4, 125.5, 132.4, 135.6, 148.0, 148.2, 174.8, 199.4, 199.6; HRMS (ESI): Calculated for  $C_{29}H_{48}O_6Na$   $[M+Na]^+$  515.3349, found 515.3351.

## Spiroketal 20

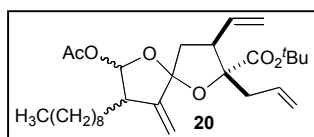

A solution of the lactols **2** (32 mg, 0.065 mmol) in THF (1.5  $cm^3$ ) was cooled to  $0^\circ C$  and treated with 3 M  $HClO_4$  (0.5  $cm^3$ ). The solution was stirred at  $0^\circ C$  for 1 h, then quenched with saturated aqueous  $NaHCO_3$  and the aqueous phase was extracted with EtOAc. The combined organic extracts were washed with water, brine, dried and concentrated and the residue was dissolved in pyridine (1.25  $cm^3$ ) and DMAP (0.80 mg, 6.50  $\mu$ mol) and acetic anhydride (37  $\mu$ L, 0.390 mmol) were added. The solution was stirred at rt for 16 h and then diluted with water and the aqueous phase was extracted with EtOAc. The combined organic extracts were washed with saturated aqueous  $CuSO_4$ , water, brine, dried, and concentrated. The crude product was purified by flash chromatography with 5% EtOAc/petrol as eluent to afford acetate **20** (16.5 mg, 41%) as an inseparable mixture of

diastereoisomers:  $\nu_{\max}$  2927, 2856, 1750, 1368, 1230  $\text{cm}^{-1}$ ;  $\delta_{\text{H}}$  (400 MHz) 0.87 (t,  $J = 7.2$  Hz, 3H), 1.25 (br s, 14H), 1.45 (s, 9H), 1.63 (m, 2H), 2.01-2.63 (m, 7H), 2.80-2.89 (m, 0.5H), 3.04-3.11 (m, 0.5H), 3.35 (m, 0.5H), 3.45 (m, 0.5H), 5.01-5.36 (m, 6H), 5.74-5.97 (m, 2H), 5.97 (s, 1H), 6.12 (s, 1H), 6.48 (d,  $J = 5.2$  Hz, 0.5H);  $\delta_{\text{C}}$  (100 MHz) 14.1, 21.2, 21.5, 21.6, 22.7, 26.3, 26.5, 26.6, 26.9, 27.2, 28.0, 28.0, 29.3, 29.3, 29.3, 29.4, 29.5, 29.5, 29.6, 29.7, 29.7, 31.8, 31.9, 32.3, 32.9, 38.7, 38.9, 39.2, 39.4, 42.2, 42.8, 43.0, 43.7, 45.6, 47.8, 47.9, 48.1, 48.2, 48.6, 48.8, 49.5, 51.2, 80.9, 81.3, 81.4, 86.9, 86.9, 87.5, 87.6, 89.1, 95.7, 100.0, 100.4, 108.1, 110.0, 113.3, 113.7, 113.7, 117.3, 117.5, 117.6, 117.9, 118.4, 118.5, 118.6, 127.7, 132.5, 132.7, 132.8, 132.9, 133.4, 134.8, 134.9, 135.2, 136.0, 148.9, 149.0, 149.4, 150.7, 169.9, 171.1, 171.3, 171.7, 171.8; HRMS (ESI): Calculated for  $\text{C}_{29}\text{H}_{46}\text{O}_6\text{Na}$   $[\text{M}+\text{Na}]^+$  513.3192, found 513.3194.

### Alcohol 27

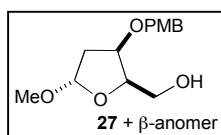

To a solution of **7** (10.0 g, 25.6 mmol) in benzene (225  $\text{cm}^3$ ) was added *p*-nitrobenzoic acid (8.6 g, 51.2 mmol), triphenylphosphene (16.8 g, 64.0 mmol) and DIAD (12.4  $\text{cm}^3$ , 64.0 mmol). The solution was stirred at rt for 16 h and the benzene was removed under reduced pressure and the crude product was purified by flash chromatography with 5% EtOAc/petrol as eluent. The resultant benzoate ester was dissolved in MeOH (500  $\text{cm}^3$ ) and treated with potassium carbonate (5.3 g, 38.4 mmol) at rt for 16 h and then diluted with water. The aqueous phase was extracted with  $\text{CH}_2\text{Cl}_2$  and the combined organic extracts were washed with water, brine and dried, and concentrated to give the alcohol (7.2 g, 72%) as a pale yellow oil. A solution of the alcohol (3.2 g, 8.19 mmol) in DMF (45  $\text{cm}^3$ ) was added via cannula to a suspension of NaH (60% dispersion in oil, 492 mg, 12.3 mmol) in DMF (45  $\text{cm}^3$ ). PMBCl (1.7  $\text{cm}^3$ , 12.3 mmol) was added and the solution was stirred at rt for 4 h and then quenched with water. The aqueous phase was extracted with  $\text{Et}_2\text{O}$  and the combined organic extracts were washed with water, brine, dried and concentrated. The crude product was dissolved in MeOH (500  $\text{cm}^3$ ) and treated with 10% HCl (0.5  $\text{cm}^3$ ). The reaction was stirred at rt for 16 h and quenched with saturated aqueous  $\text{NaHCO}_3$ . The MeOH was removed under reduced pressure and  $\text{Et}_2\text{O}$  was added and the organic phase was washed with water, brine, dried and concentrated. The crude product was purified by flash chromatography with 20% EtOAc/petrol as eluent to afford **27** (0.90 g, 41%) as a yellow oil:  $[\alpha]_{\text{D}}^{23} +25.1$  ( $c$  1.35,  $\text{CH}_2\text{Cl}_2$ );  $\nu_{\max}$  3460 2916, 2835, 1612, 1514, 1248, 1037  $\text{cm}^{-1}$ ;  $\delta_{\text{H}}$  (500 MHz) 2.16 (m, 2H), 3.33 (s, 3H), 3.80 (s, 3H), 3.82 (m, 2H), 4.11 (dd,  $J = 10.0, 4.0$  Hz, 1H), 4.37 (dd,  $J = 11.5, 6.0$  Hz, 1H), 4.43 (ABq,  $J = 11.5$  Hz, 2H), 5.15 (t,  $J = 3.5$  Hz, 1H), 6.87 (d,  $J = 9.0$  Hz, 2H), 7.22 (d,  $J = 9.0$  Hz, 2H);  $\delta_{\text{C}}$  (125 MHz) 39.5, 55.0, 55.2, 61.8, 71.4, 78.8, 78.9, 104.0,

113.9, 129.3, 129.4, 159.4; HRMS (ESI): Calculated for C<sub>14</sub>H<sub>20</sub>O<sub>5</sub>Na [M+Na]<sup>+</sup> 291.1208, found 291.1206.

Further elution afforded the β-anomer (0.79 g, 36%) as a yellow oil: [α]<sub>D</sub><sup>23</sup> -94.8 (c 0.34, CH<sub>2</sub>Cl<sub>2</sub>); ν<sub>max</sub> 3447 2922, 2851, 1612, 1514, 1248, 1034 cm<sup>-1</sup>; δ<sub>H</sub> (500 MHz) 2.11-2.25 (m, 2H), 3.40 (s, 3H), 3.81 (s, 3H), 3.82 (m, 2H), 4.15 (dd, *J* = 11.0, 5.5 Hz, 1H), 4.22 (m, 1H), 4.48 (ABq, *J* = 11.5 Hz, 2H), 5.02 (dd, *J* = 6.0, 2.0 Hz, 1H), 6.88 (d, *J* = 8.5 Hz, 2H), 7.25 (d, *J* = 8.5 Hz, 2H); δ<sub>C</sub> (125 MHz) 38.0, 55.3, 55.5, 62.4, 71.5, 77.8, 80.8, 104.7, 113.9, 129.4, 129.6, 159.4; HRMS (ESI): Calculated for C<sub>14</sub>H<sub>20</sub>O<sub>5</sub>Na [M+Na]<sup>+</sup> 291.1208, found 291.1206.

### Allyl ester **26**

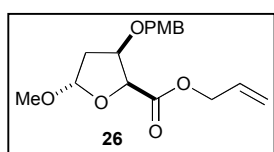

Dess-Martin periodinane (2.23 g, 5.26 mmol) was added to a solution of alcohol **27** (940 mg, 3.50 mmol) in CH<sub>2</sub>Cl<sub>2</sub> (40 cm<sup>3</sup>) and pyridine (850, 10.5 mmol) and the resulting solution was stirred at rt for 30 min and quenched

with saturated aqueous NaHCO<sub>3</sub> and 1.5 M Na<sub>2</sub>S<sub>2</sub>O<sub>3</sub>. The biphasic mixture was stirred for 15 min and the aqueous phase was extracted with Et<sub>2</sub>O and the combined organic extracts were washed with water, brine, dried, and concentrated. The crude product was dissolved in EtOH (20 cm<sup>3</sup>) and a solution of AgNO<sub>3</sub> (1.47 g, 8.75 mmol) in water (2.0 cm<sup>3</sup>) and KOH (1.32 g, 22.8 mmol) in water (18.0 cm<sup>3</sup>) were then added and the dark suspension was stirred at rt for 16 h. The suspension was filtered through celite and the filter cake was washed with 1 M KOH. Et<sub>2</sub>O was added and the organic phase was separated and discarded. The aqueous phase was acidified with 10% HCl, extracted with Et<sub>2</sub>O and the combined organic extracts were washed with water, brine, dried, and concentrated to give an acid (781 mg, 79%). A solution of the crude acid (781 mg, 2.77 mmol) in dry CH<sub>2</sub>Cl<sub>2</sub> (25 cm<sup>3</sup>) was cooled to 0°C and DMAP (43 mg, 0.350 mmol), allyl alcohol (262 μL, 3.85 mmol) and DCC (794 mg, 3.85 mmol) were added. The mixture was warmed to rt and stirred for 16 h then filtered and the filtrate was concentrated under reduced pressure. The crude product was purified by flash chromatography with 10% EtOAc/petrol as eluent to afford ester **26** (580 mg, 65%) as a pale yellow oil: [α]<sub>D</sub><sup>23</sup> +56.2 (c 1.03, CH<sub>2</sub>Cl<sub>2</sub>); ν<sub>max</sub> 2934, 2835, 1761, 1613, 1514, 1250, 1065 cm<sup>-1</sup>; δ<sub>H</sub> (500 MHz) 2.08 (ddd, *J* = 14.0, 6.5, 2.0 Hz, 1H), 2.26 (m, 1H), 3.36 (s, 3H), 3.79 (s, 3H), 4.44 (ABq, *J* = 11.5 Hz, 2H), 4.48 (m, 1H), 4.62 (dd, *J* = 12.8, 6.0 Hz, 1H), 4.69 (d, *J* = 5.5 Hz, 1H), 4.72 (dd, *J* = 12.8, 6.0 Hz, 1H), 5.21 (m, 1H), 5.29-5.34 (m, 2H), 5.89 (m, 1H), 6.84 (d, *J* = 8.5 Hz, 2H) 7.18 (d, *J* = 8.5 Hz, 2H); δ<sub>C</sub> (125 MHz) 38.5, 55.1, 55.4, 65.6, 71.4, 78.3, 79.1, 105.0, 113.6, 118.6, 129.1, 129.5, 131.7, 159.1, 168.6; HRMS (ESI): Calculated for C<sub>17</sub>H<sub>22</sub>O<sub>6</sub>Na [M+Na]<sup>+</sup> 345.1314, found 345.1314.

### *tert*-Butyl ester *ent*-9

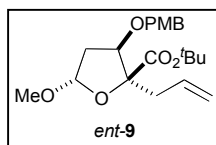

$n$ BuLi in hexanes (3.2 cm<sup>3</sup>, 2.1 M, 6.69 mmol) was added dropwise to a cooled solution of  $i$ Pr<sub>2</sub>NH (0.85 cm<sup>3</sup>, 6.08 mmol) in dry THF (15 cm<sup>3</sup>) at 0°C under argon. The resultant LDA solution was stirred at 0°C for 5 min, then cooled to –

78°C and added dropwise via cannula to a solution of the allyl ester **26** (0.98 g, 3.04 mmol) and the supernatant from a centrifuged mixture of freshly distilled TMSCl (2.2 cm<sup>3</sup>, 17.3 mmol) and NEt<sub>3</sub> (2.2 cm<sup>3</sup>, 15.8 mmol) in dry THF (22 cm<sup>3</sup>) and HMPA (4.0 cm<sup>3</sup>) at –100°C. The solution was stirred at –100°C for 10 min and then allowed to warm to rt and stirred for 2 h. The solution was cooled to 0°C and aqueous 1 M NaOH (25 cm<sup>3</sup>) was added followed by Et<sub>2</sub>O and water. The organic phase was separated and discarded and the aqueous phase was cooled to 0°C, acidified with 10% HCl and extracted with Et<sub>2</sub>O. The combined organic extracts were washed with water, brine, dried and concentrated and the crude residue was dissolved in dry CH<sub>2</sub>Cl<sub>2</sub> (50 cm<sup>3</sup>) and treated with *N,N'*-diisopropyl-*O*-*t*-butylisourea (3.04 g, 15.2 mmol) for 16 h at rt. The white suspension was filtered and the filtrate was concentrated under reduced pressure. The crude product was purified by flash chromatography with 10% EtOAc/petrol as eluent to give *t*-butyl ester *ent*-9 (0.79 g, 67%) as a colourless oil. The physical data for *ent*-9 was identical to **9** except for the sign of rotation:  $[\alpha]_D^{23} +60.1$  (*c* 0.98, CH<sub>2</sub>Cl<sub>2</sub>).

### (+)-Trachyspic acid tri-*tert*-butyl ester *ent*-23

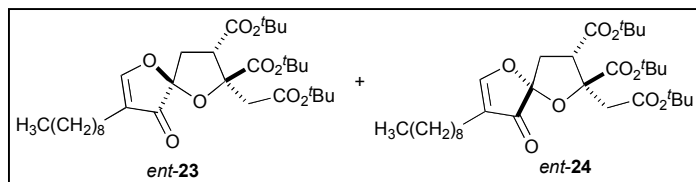

Coupling of bromoalkene **4** (100 mg, 0.313 mmol) and triester *ent*-13 (44 mg, 0.110 mmol) in Et<sub>2</sub>O (1.0 cm<sup>3</sup>) followed by spirocyclisation, ozonolysis and elimination

in a manner similar to that described for **13** gave spiroisomers *ent*-24 (0.6 mg, 3%) and *ent*-23 (8.5 mg, 52%). The physical data for *ent*-24 was identical to **24** except for the sign of rotation:  $[\alpha]_D^{24} +19.5$  (*c* 0.03, CH<sub>2</sub>Cl<sub>2</sub>); HRMS (ESI): Calculated for C<sub>32</sub>H<sub>52</sub>O<sub>9</sub>Na [M+Na]<sup>+</sup> 603.3509, found 603.3512. The physical data for *ent*-23 was identical to **23** except for the sign of rotation:  $[\alpha]_D^{23} +16.4$  (*c* 0.40, CH<sub>2</sub>Cl<sub>2</sub>); HRMS (ESI): Calculated for C<sub>32</sub>H<sub>52</sub>O<sub>9</sub>Na [M+Na]<sup>+</sup> 603.3509, found 603.3509.

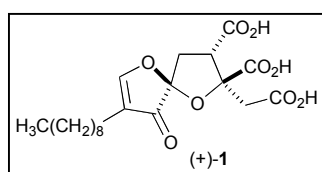

### (+)-Trachyspic acid (**1**)

Deprotection of tri-*t*-butylester *ent*-23 (8.5 mg, 14.6 μmol) in a manner similar to that described above for **23** afforded (+)-trachyspic acid (**1**)

(6.0 mg, 99%) which was identical in all aspects to natural trachypsic acid (**1**):  $[\alpha]_D^{22} +3.1$  (*c* 0.30, MeOH);  $[\alpha]_D^{23} +7.1$  (*c* 0.30, CH<sub>2</sub>Cl<sub>2</sub>); lit.<sup>3</sup>  $[\alpha]_D^{25} +3.1$  (*c* 1.0, MeOH); HRMS (ESI): Calculated for C<sub>20</sub>H<sub>28</sub>O<sub>9</sub>Na [M+Na]<sup>+</sup> 435.1631, found 435.1638.

### (+)-Trachypsic acid trimethyl ester (**25**)

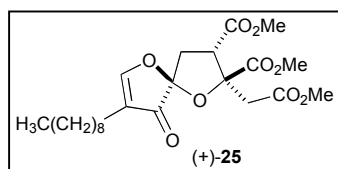

Methylation of (+)-trachypsic acid (**1**) (6.0 mg, 14.5 μmol) as described above for (–)-*ent*-**1** gave the trimethyl ester **25** (4.0 mg, 61%). The physical data for **25** was identical that for natural **25**:  $[\alpha]_D^{23} +17.3$  (*c* 0.10, CH<sub>2</sub>Cl<sub>2</sub>); HRMS (ESI): Calculated for C<sub>23</sub>H<sub>34</sub>O<sub>9</sub>Na [M+Na]<sup>+</sup> 477.2101, found 477.2097.

### Lactone triester **29**

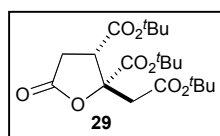

Ozone gas was bubbled through a solution of the alkene **12** (98 mg, 0.388 mmol) in CH<sub>2</sub>Cl<sub>2</sub> (9.8 cm<sup>3</sup>) and MeOH (600 μL) at –78°C until a pale blue colour persisted. Me<sub>2</sub>S (285 μL, 3.88 mmol) was added and the solution was warmed to rt and stirred for 1 h. Water was added and the aqueous phase was extracted with Et<sub>2</sub>O and the combined organic extracts were washed with water, brine, dried and concentrated. The crude product was dissolved in a mixture of *t*-BuOH (9.8 cm<sup>3</sup>) and 2-methyl-2-butene (1.6 cm<sup>3</sup>) and a solution of NaH<sub>2</sub>PO<sub>4</sub>·H<sub>2</sub>O (429 mg, 3.11 mmol) and 80% NaClO<sub>2</sub> (702 mg, 6.21 mmol) in water (5.3 cm<sup>3</sup>) was then added and the mixture was stirred at rt for 16 h. Water and Et<sub>2</sub>O were added and organic layer was separated and discarded. The aqueous phase was acidified with 10% HCl and extracted with Et<sub>2</sub>O and the combined organic extracts were washed with water, brine and dried and concentrated. A solution of the crude product in dry CH<sub>2</sub>Cl<sub>2</sub> (25 cm<sup>3</sup>) was treated with *N,N'*-diisopropyl-*O-t*-butylisourea (1.56 g, 7.77 mmol) for 16 h at rt. The suspension was filtered through celite and the filtrate was concentrated and the crude product was purified by flash chromatography with 10% EtOAc/petrol as eluent to give the triester **29** (62 mg, 40%) as a colourless crystalline solid:  $[\alpha]_D^{19} +3.3$  (*c* 0.55, CH<sub>2</sub>Cl<sub>2</sub>);  $\nu_{\max}$  2980, 1804, 1736, 1369, 1151 cm<sup>-1</sup>;  $\delta_H$  (400 MHz) 1.45 (s, 9H), 1.46 (s, 9H), 1.47 (s, 9H), 2.66 (dd, *J* = 17.6, 9.2 Hz, 1H), 3.07 (ABq, *J* = 16.8 Hz, 2H), 3.12 (dd, *J* = 18.0, 11.6 Hz, 1H), 3.76 (dd, *J* = 11.6, 9.6 Hz, 1);  $\delta_C$  (100 MHz) 27.8, 27.9, 28.0, 31.0, 40.3, 48.1, 81.9, 82.9, 83.9, 84.3, 167.1, 167.5, 168.0, 174.0; HRMS (ESI): Calculated for C<sub>20</sub>H<sub>32</sub>O<sub>8</sub>Na [M+Na]<sup>+</sup> 423.1995, found 423.1992. Further elution provided the dimethylacetal byproduct (10 mg, 7%) as a yellow oil:  $[\alpha]_D^{17} +5.8$  (*c* 1.05, CH<sub>2</sub>Cl<sub>2</sub>);  $\nu_{\max}$  2981, 1798, 1742, 1370, 1260, 1151 cm<sup>-1</sup>;  $\delta_H$  (400 MHz) 1.46 (s, 18H), 2.25 (dd, *J* = 14.4, 5.6 Hz, 1H), 2.58 (dd, *J* = 14.4, 5.6 Hz, 1H), 2.61 (dd, *J* = 18.0, 9.6 Hz, 1H), 3.03 (dd, *J* = 17.6, 11.2 Hz, 1H), 3.32 (s, 3H), 3.34 (s, 3H), 3.61 (dd, *J* = 11.6, 9.6 Hz, 1H), 4.64 (t, *J* = 5.6 Hz, 1H);  $\delta_C$  (100 MHz) 27.8, 27.9, 31.4, 38.0,

49.2, 53.1, 53.9, 82.6, 83.8, 84.7, 101.3, 167.5, 167.7, 174.2; HRMS (ESI): Calculated for  $C_{18}H_{30}O_8Na$   $[M+Na]^+$  397.1838, found 397.1837.

### Lactols **30**

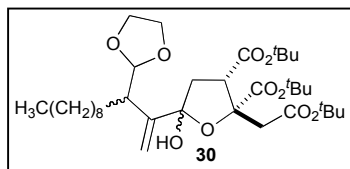

A solution of  $tBuLi$  in hexanes (178  $\mu L$ , 1.4 M, 0.250 mmol) was added dropwise to a solution of bromoalkene **4** (45 mg, 0.142 mmol) in dry  $Et_2O$  (1.0  $cm^3$ ) and dry hexane (0.5  $cm^3$ ) at  $-78^\circ C$  under argon.

The anion solution was stirred at  $-78^\circ C$  for 5 min and a solution of lactone **29** (20 mg, 49.9  $\mu mol$ ) in  $Et_2O$  (0.5  $cm^3$ ) and hexane (0.4  $cm^3$ ) was added dropwise via cannula. The orange solution was stirred at  $-78^\circ C$  for 2 h and quenched with water. The aqueous phase was extracted with  $Et_2O$  and the combined organic extracts were washed with water, brine and dried and concentrated. Purification of the crude product by flash chromatography with 10%  $EtOAc$ /petrol as eluent gave recovered triester **29** (5 mg). Further elution afforded lactols **30** (10 mg, 31%, 42% based on recovered triester **29**) as a mixture of diastereoisomers:  $\nu_{max}$  3485, 2926, 2854, 1732, 1367, 1151  $cm^{-1}$ ;  $\delta_H$  (500 MHz) 0.86 (m, 3H), 1.23 (m, 14H), 1.42 (s, 9H), 1.44 (s, 9H), 1.49 (s, 9H), 1.68 (m, 2H), 2.66-3.25 (m, 4H), 3.72-3.94 (m, 5H), 4.80 (d,  $J = 4.5$  Hz, 0.5H), 4.86 (d,  $J = 5.0$  Hz, 0.5H), 5.83 (d,  $J = 3.5$  Hz, 1H), 6.21 (s, 1H);  $\delta_C$  (100 MHz) 14.1, 22.7, 27.0, 27.1, 27.8, 27.9, 28.0, 28.0, 28.1, 29.0, 29.2, 29.3, 29.5, 29.5, 29.6, 29.7, 31.9, 31.9, 35.2, 35.3, 42.1, 42.2, 43.0, 43.7, 48.2, 48.3, 49.2, 61.3, 64.7, 64.7, 64.9, 65.0, 74.5, 74.5, 81.3, 81.4, 83.2, 105.8, 106.2, 117.2, 125.1, 125.9, 146.5, 147.2, 147.4, 170.0, 170.2, 172.2, 199.3, 199.5; HRMS (ESI): Calculated for  $C_{35}H_{60}O_{10}Na$   $[M+Na]^+$  663.4084, found 663.4083.

### (-)-3-*epi*-Trachyspic acid tri-*tert*-butyl ester (**31**)

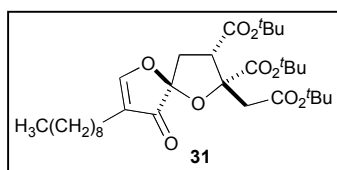

A solution of lactols **30** (20 mg, 31.2  $\mu mol$ ) in THF (1.0  $cm^3$ ) was cooled to  $0^\circ C$  and treated with 3 M  $HClO_4$  (0.5  $cm^3$ ). The solution was stirred at  $0^\circ C$  for 1 h, then quenched with saturated aqueous  $NaHCO_3$

and the aqueous phase was extracted with  $Et_2O$ , washed with water, brine, dried and concentrated. The crude product was dissolved in pyridine (1.0  $cm^3$ ) and DMAP (0.76 mg, 6.24  $\mu mol$ ) and acetic anhydride (30  $\mu L$ , 0.312 mmol) were added. The solution was stirred at rt for 16 h, water was added and the aqueous phase was extracted with  $Et_2O$ , washed with water, brine, dried and concentrated. The crude product was dissolved in  $CH_2Cl_2$  (1.0  $cm^3$ ) and MeOH (100  $\mu L$ ) and ozone gas was bubbled through the solution at  $-78^\circ C$  until a pale blue colour persisted.  $Me_2S$  (23  $\mu L$ , 0.312 mmol) and  $NaHCO_3$  (26 mg, 0.312 mmol) were added and the solution was warmed to rt and stirred for 16



h. Water was added and the aqueous phase was extracted with Et<sub>2</sub>O and the combined organic extracts were washed with water, brine, dried and concentrated. The crude product was purified by flash chromatography with 5-10% EtOAc/petrol as eluent to afford **31** (5.5 mg, 31%) as a thin film:  $[\alpha]_D^{22} -9.7$  (*c* 0.18, CH<sub>2</sub>Cl<sub>2</sub>);  $\nu_{\max}$  2928, 1732, 1368, 1153 cm<sup>-1</sup>;  $\delta_H$  (400 MHz) 0.87 (t, *J* = 7.2 Hz, 3H), 1.25 (br s, 14H) 1.45 (s, 9H), 1.46 (s, 9H), 1.54 (s, 9H), 2.09 (t, *J* = 8.0 Hz, 2H), 2.19 (dd, *J* = 13.2, 7.2 Hz, 1H), 3.03 (ABq, *J* = 15.6 Hz, 2H), 2.88 (t, *J* = 13.2 Hz, 1H), 4.03 (dd, *J* = 12.8, 6.8 Hz, 1H), 7.79 (s, 1H);  $\delta_C$  (100 MHz) 14.1, 21.2, 22.7, 27.8, 27.9, 28.0, 28.1, 29.3, 29.3, 29.5, 31.8, 37.5, 41.4, 49.2, 81.1, 82.0, 83.3, 88.0, 108.7, 118.3, 168.1, 168.1, 168.9, 171.2, 198.0; HRMS (ESI): Calculated for C<sub>32</sub>H<sub>52</sub>O<sub>9</sub>Na [M+Na]<sup>+</sup> 603.3509, found 603.3505.

### (+)-3-*epi*-Trachyspic acid (+)-**(28)**

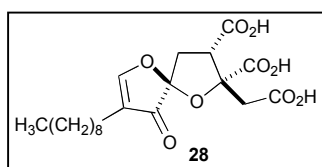

A solution of the tri-*tert*-butylester **31** (5.5 mg, 9.5 μmol) in dry CH<sub>2</sub>Cl<sub>2</sub> (1.0 cm<sup>3</sup>) was cooled to 0°C and treated with TFA (200 μL). The solution was stirred at 0°C for 1 h, then warmed to rt and stirred for 16 h.

Toluene (1.0 cm<sup>3</sup>) was added and the solvent was removed under reduced pressure to afford 3-*epi*-trachyspic acid (+)-**(28)** (3.7 mg, 94%) as a thin film:  $[\alpha]_D^{22} +2.9$  (*c* 0.10, MeOH);  $[\alpha]_D^{23} +10.9$  (*c* 0.10, CH<sub>2</sub>Cl<sub>2</sub>);  $\nu_{\max}$  3425, 2926, 2855, 1720, 1602, 1369, 1150 cm<sup>-1</sup>;  $\delta_H$  (500 MHz, *d*<sub>6</sub>-DMSO) 0.84 (t, *J* = 6.5 Hz, 3H), 1.23 (br s, 12H), 1.38 (m, 2H), 2.02 (t, *J* = 7.5 Hz, 2H), 2.21 (dd, *J* = 13.0, 7.0 Hz, 1H), 2.50 (m, 1H), 2.66 (d, *J* = 16.5 Hz, 1H), 3.22 (d, *J* = 16.5 Hz, 1H), 3.51 (dd, *J* = 13.0, 7.0 Hz, 1H), 8.41 (s, 1H);  $\delta_C$  (100 MHz, *d*<sub>6</sub>-DMSO) 14.0, 20.5, 22.1, 27.5, 28.6, 28.7, 28.9, 31.3, 36.5, 42.9, 50.6, 87.1, 108.6, 117.1, 170.2, 170.3, 170.4, 173.7, 197.3; HRMS (ESI): Calculated for C<sub>20</sub>H<sub>28</sub>O<sub>9</sub>H [M-H]<sup>-</sup> 411.1661, found 411.1650.

### (+)-3-*epi*-Trachyspic acid tri-*tert*-butyl ester (*Ent*-**31**)

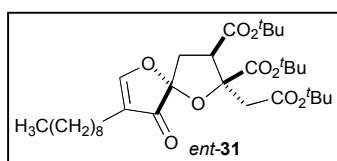

Coupling of bromoalkene **4** (141 mg, 0.441 mmol) and lactone *ent*-**29** (62 mg, 0.155 mmol) followed by spirocyclisation, ozonolysis and elimination in a manner similar to that described for **29** gave spiroketal *ent*-**31** (11 mg, 31%).

The physical data for *ent*-**31** was identical to **31** except for the sign of rotation:  $[\alpha]_D^{23} +6.3$  (*c* 0.45, CH<sub>2</sub>Cl<sub>2</sub>); HRMS (ESI): Calculated for C<sub>32</sub>H<sub>52</sub>O<sub>9</sub>Na [M+Na]<sup>+</sup> 603.3509, found 603.3506.

### (-)-3-*epi*-Trachyspic acid (-)-*ent*-**(28)**

Deprotection of the tri-*tert*-butylester *ent*-**31** (8.0 mg, 13.8 μmol) in a manner similar to that described above for **31** afford (-)-3-*epi*-trachyspic acid (*ent*-**28**) (5.5 mg, 96%). The physical data

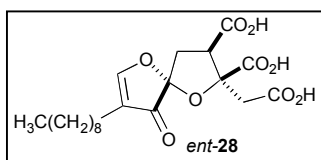

for (-)-3-*epi*-trachyspic acid (*ent*-**28**) was identical to (+)-3-*epi*-trachyspic acid (**28**) except for the sign of rotation:  $[\alpha]_{\text{D}}^{24} -3.4$  (*c* 0.25, MeOH);  $[\alpha]_{\text{D}}^{24} -20.1$  (*c* 0.25,  $\text{CH}_2\text{Cl}_2$ ); HRMS (ESI): Calculated for

$\text{C}_{20}\text{H}_{28}\text{O}_9\text{H} [\text{M}-\text{H}]^-$  411.1661, found 411.1645.

**Table 1:**  $^1\text{H}$  (400 MHz,  $d_6$ -DMSO) and  $^{13}\text{C}$  NMR data (100 MHz,  $d_6$ -DMSO) for natural and synthetic trachyspic acid (**1**).

| Carbon atom | Natural trachyspic acid <sup>1</sup> |                     |                     | Synthetic trachyspic acid |                     |                     |
|-------------|--------------------------------------|---------------------|---------------------|---------------------------|---------------------|---------------------|
|             | $\delta_{\text{C}}$                  | $\delta_{\text{H}}$ | (mult, $J$ )        | $\delta_{\text{C}}$       | $\delta_{\text{H}}$ | (mult, $J$ )        |
| 1           | 170.0                                | -                   |                     | 170.1                     | -                   |                     |
| 2           | 38.7                                 | 2.69                | (1H, d, 16.8)       | 38.7                      | 2.67                | (1H, d, 16.8)       |
|             |                                      | 2.87                | (1H, d, 16.8)       |                           | 2.85                | (1H, d, 16.8)       |
| 3           | 86.5                                 | -                   |                     | 86.5                      | -                   |                     |
| 4           | 48.4                                 | 3.57                | (1H, dd, 7.7, 12.0) | 48.4                      | 3.56                | (1H, dd, 7.8, 11.8) |
| 5           | 37.4                                 | 2.38                | (2H, m)             | 37.6                      | 2.36                | (2H, m)             |
| 6           | 108.0                                | -                   |                     | 108.1                     | -                   |                     |
| 7           | 198.1                                | -                   |                     | 198.2                     | -                   |                     |
| 8           | 116.7                                | -                   |                     | 116.7                     | -                   |                     |
| 9           | 174.3                                | 8.45                | (1H, s)             | 174.5                     | 8.45                | (1H, s)             |
| 10          | 20.4                                 | 2.03                | (2H, t, 7.5)        | 20.5                      | 2.02                | (2H, t, 7.8)        |
| 11          | 27.4                                 | 1.40                | (2H, m)             | 27.5                      | 1.39                | (2H, m)             |
| 12          | 28.5                                 | 1.24                | (2H, br s)          | 28.6                      | 1.23                | (2H, br s)          |
| 13          | 28.6                                 | 1.24                | (2H, br s)          | 28.7                      | 1.23                | (2H, br s)          |
| 14          | 28.6                                 | 1.24                | (2H, br s)          | 28.7                      | 1.23                | (2H, br s)          |
| 15          | 28.8                                 | 1.24                | (2H, br s)          | 28.9                      | 1.23                | (2H, br s)          |
| 16          | 31.2                                 | 1.24                | (2H, br s)          | 31.3                      | 1.23                | (2H, br s)          |
| 17          | 22.0                                 | 1.24                | (2H, br s)          | 22.1                      | 1.23                | (2H, br s)          |
| 18          | 13.8                                 | 0.85                | (3H, t, 6.8)        | 14.0                      | 0.84                | (3H, t, 6.6)        |
| 19          | 171.2                                | -                   |                     | 171.3                     | -                   |                     |
| 20          | 170.5                                | -                   |                     | 170.6                     | -                   |                     |

<sup>1</sup> H. Shiozawa, M. Takahashi, T. Takatsu, T. Kinoshita, K. Tanzawa, T. Hosoya, K. Furuya, S. Takahashi, K. Furihata, and H. Seto, *J. Antibiot.*, 1995, **48**, 357.

**Table 2:** <sup>1</sup>H (400 MHz, *d*<sub>6</sub>-DMSO) and <sup>13</sup>C NMR data (100MHz, *d*<sub>6</sub>-DMSO) for synthetic trachyspic acid trimethyl ester (**25**).

| Carbon atom | Naturally derived trachyspic acid trimethyl ester <sup>1</sup> |                |                     | Synthetic trachyspic acid trimethyl ester |                |                     |
|-------------|----------------------------------------------------------------|----------------|---------------------|-------------------------------------------|----------------|---------------------|
|             | δ <sub>C</sub>                                                 | δ <sub>H</sub> | (mult, J)           | δ <sub>C</sub>                            | δ <sub>H</sub> | (mult, J)           |
| 1           | 169.1                                                          | -              |                     | 169.1                                     | -              |                     |
| 2           | 38.5                                                           | 2.87           | (1H, d, 16.5)       | 38.5                                      | 2.87           | (1H, d, 16.8)       |
|             |                                                                | 2.93           | (1H, d, 16.5)       |                                           | 2.93           | (1H, d, 16.8)       |
| 3           | 86.5                                                           | -              |                     | 86.5                                      | -              |                     |
| 4           | 47.7                                                           | 3.81           | (1H, dd, 7.5, 12.5) | 47.7                                      | 3.80           | (1H, dd, 7.4, 12.7) |
|             |                                                                | 2.40           | (1H, dd, 12.5,      |                                           | 2.39           | (1H, dd, 12.7,      |
| 5           | 37.3                                                           | 2.47           | 13.5)               | 37.3                                      | 2.47           | 13.2)               |
|             |                                                                |                | (1H, dd, 7.5, 13.5) |                                           |                | (1H, dd, 7.4, 13.2) |
| 6           | 107.7                                                          | -              |                     | 107.7                                     | -              |                     |
| 7           | 197.7                                                          | -              |                     | 197.7                                     | -              |                     |
| 8           | 117.0                                                          | -              |                     | 117.0                                     | -              |                     |
| 9           | 174.7                                                          | 8.45           | (1H, s)             | 174.7                                     | 8.47           | (1H, s)             |
| 10          | 20.5                                                           | 2.02           | (2H, t, 7.5)        | 20.5                                      | 2.02           | (2H, t, 7.6)        |
| 11          | 27.5                                                           | 1.39           | (2H, m)             | 27.5                                      | 1.38           | (2H, m)             |
| 12          | 28.7                                                           | 1.23           | (2H, br s)          | 28.7                                      | 1.23           | (2H, br s)          |
| 13          | 28.8                                                           | 1.23           | (2H, br s)          | 28.8                                      | 1.23           | (2H, br s)          |
| 14          | 28.8                                                           | 1.23           | (2H, br s)          | 28.8                                      | 1.23           | (2H, br s)          |
| 15          | 29.0                                                           | 1.23           | (2H, br s)          | 29.0                                      | 1.23           | (2H, br s)          |
| 16          | 31.4                                                           | 1.23           | (2H, br s)          | 31.4                                      | 1.23           | (2H, br s)          |
| 17          | 22.2                                                           | 1.23           | (2H, br s)          | 22.2                                      | 1.23           | (2H, br s)          |
| 18          | 14.1                                                           | 0.85           | (3H, t, 7.0)        | 14.0                                      | 0.84           | (3H, t, 6.8)        |
| 19          | 170.0                                                          | -              |                     | 169.8                                     | -              |                     |
| 20          | 169.5                                                          | -              |                     | 169.5                                     | -              |                     |
| 21          | 51.9                                                           | 3.56           | (3H, s)             | 51.9                                      | 3.55           | (3H, s)             |
| 22          | 53.0                                                           | 3.71           | (3H, s)             | 53.0                                      | 3.70           | (3H, s)             |
| 23          | 52.6                                                           | 3.64           | (3H, s)             | 52.6                                      | 3.64           | (3H, s)             |

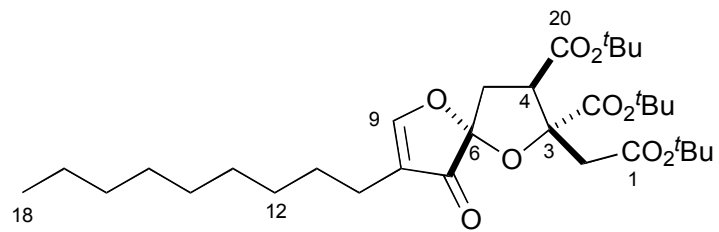

(-)-Trachypic acid tri-*t*-butyl ester (**23**)

$^1\text{H}$  NMR spectrum (400MHz,  $\text{CDCl}_3$ )

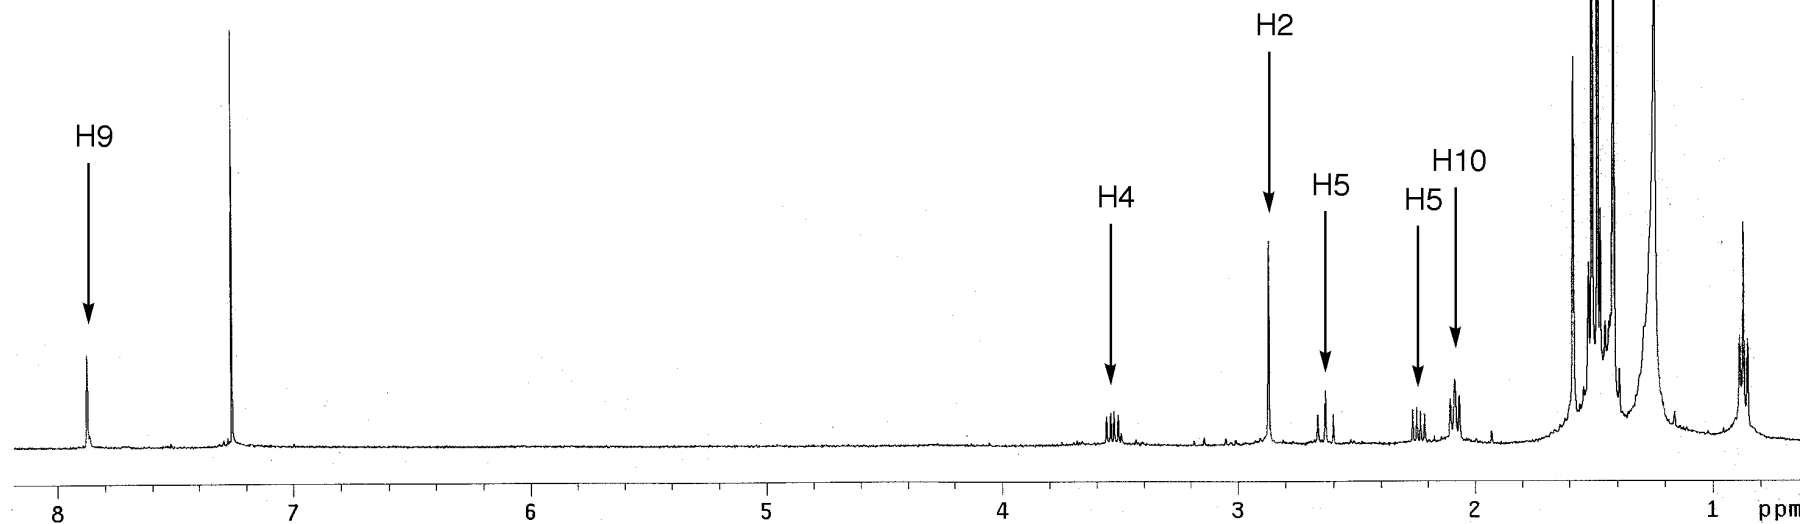

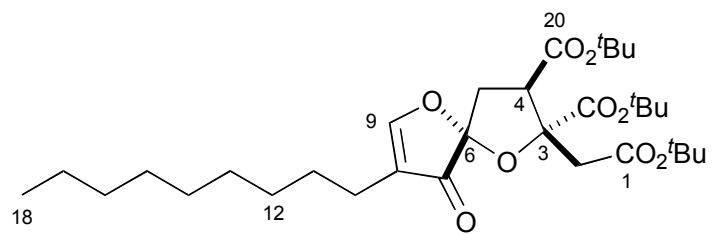

(-)-Trachyspic acid tri-*t*-butyl ester (**23**)  
<sup>13</sup>C NMR spectrum (100MHz, CDCl<sub>3</sub>)

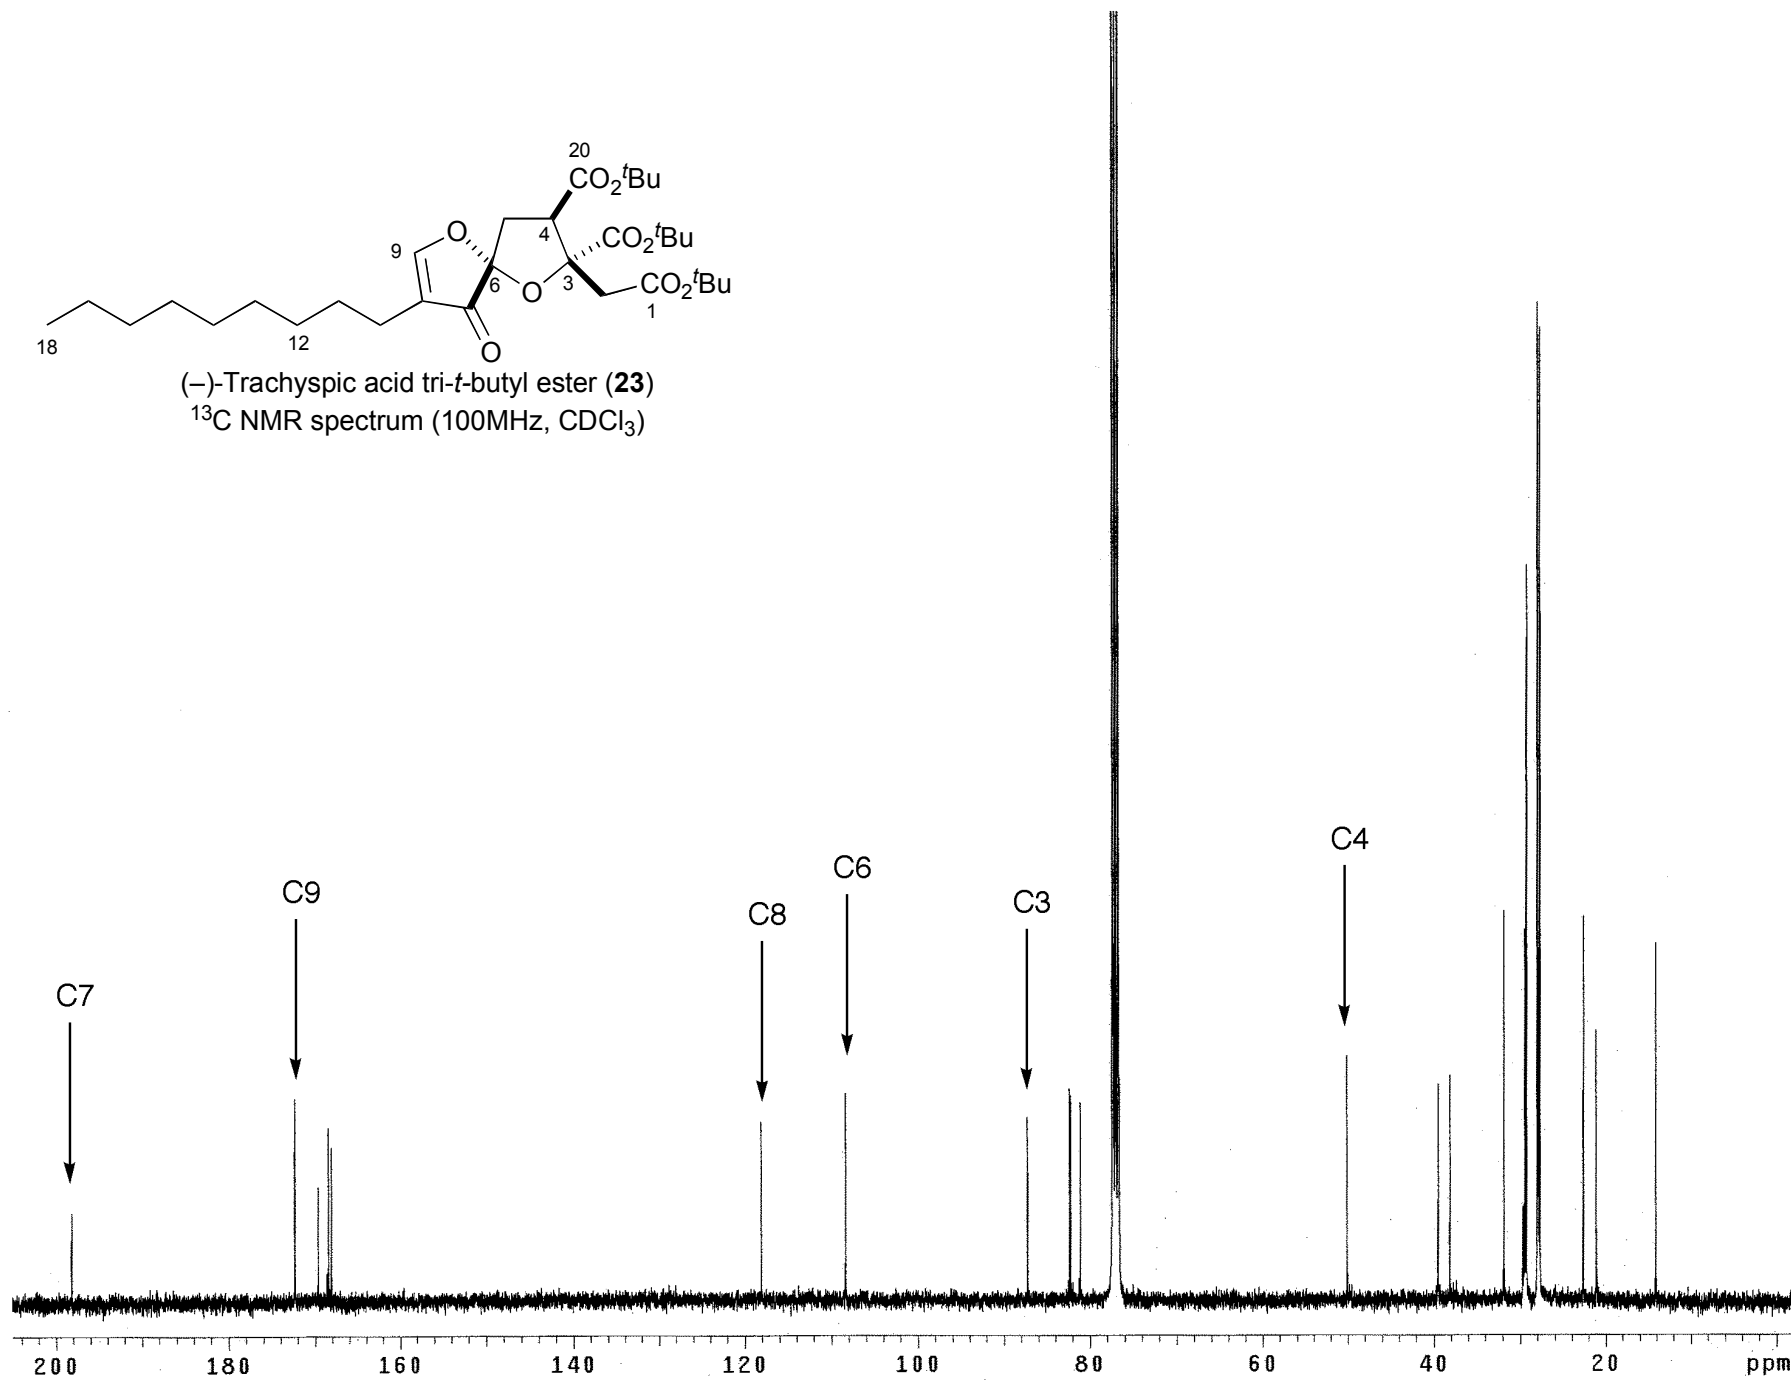

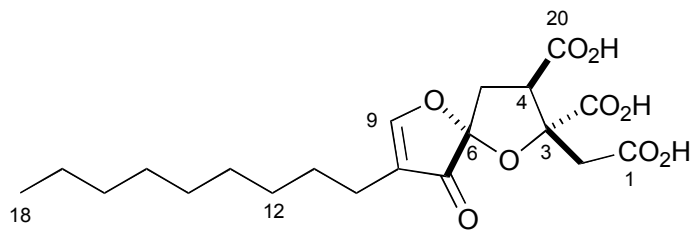

(-)-Trachyspic acid (*ent*-1)  
<sup>1</sup>H NMR spectrum (400MHz, *d*<sub>6</sub>-DMSO)

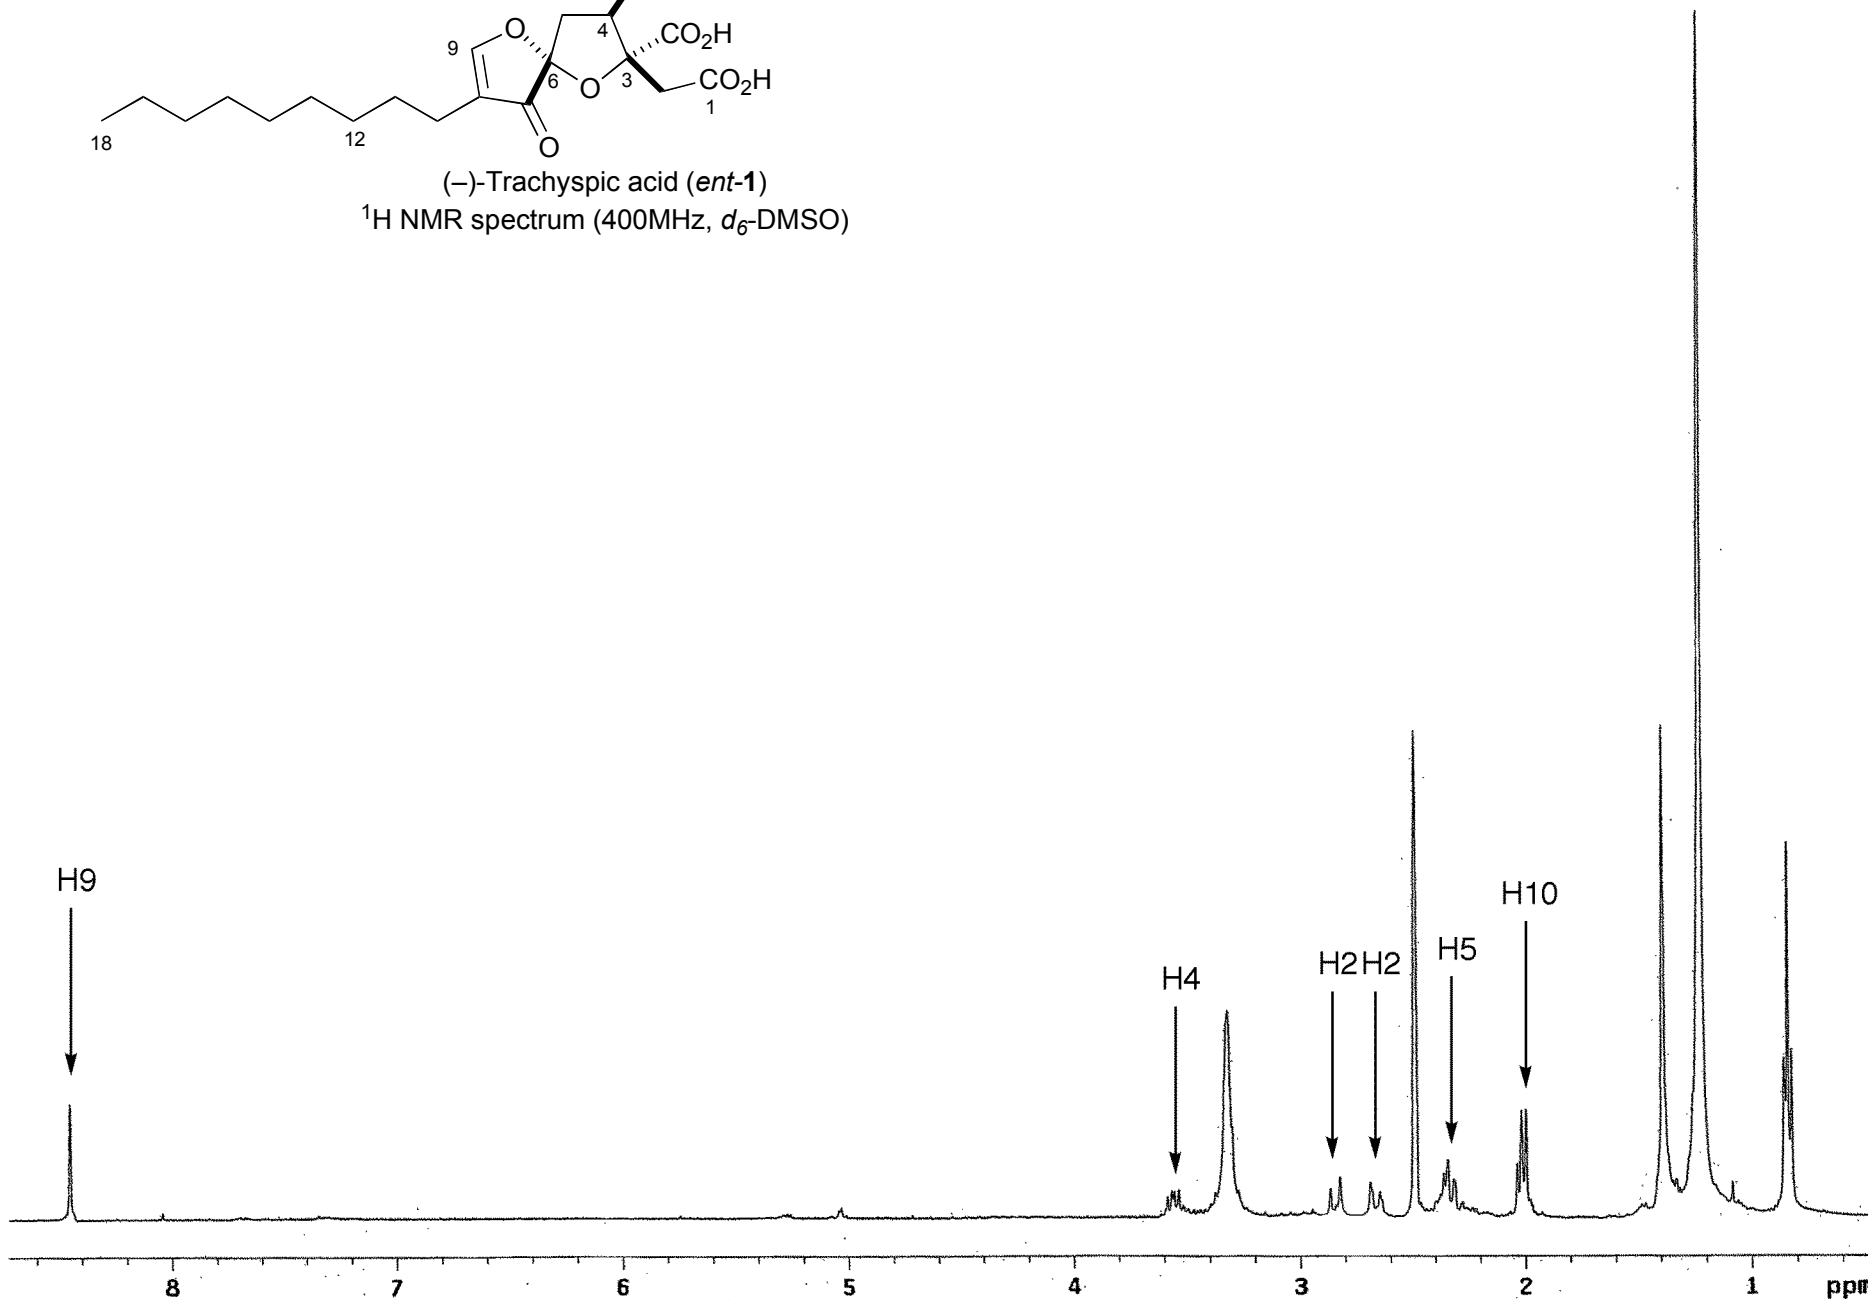

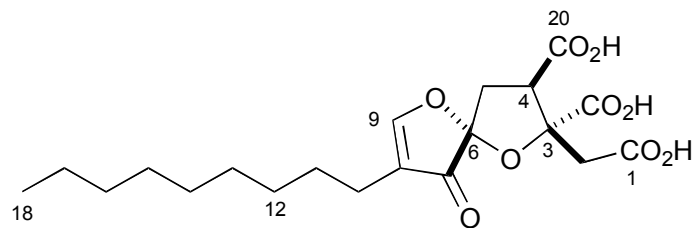

(-)-Trachyspic acid (*ent*-1)  
<sup>13</sup>C NMR spectrum (100MHz, *d*<sub>6</sub>-DMSO)

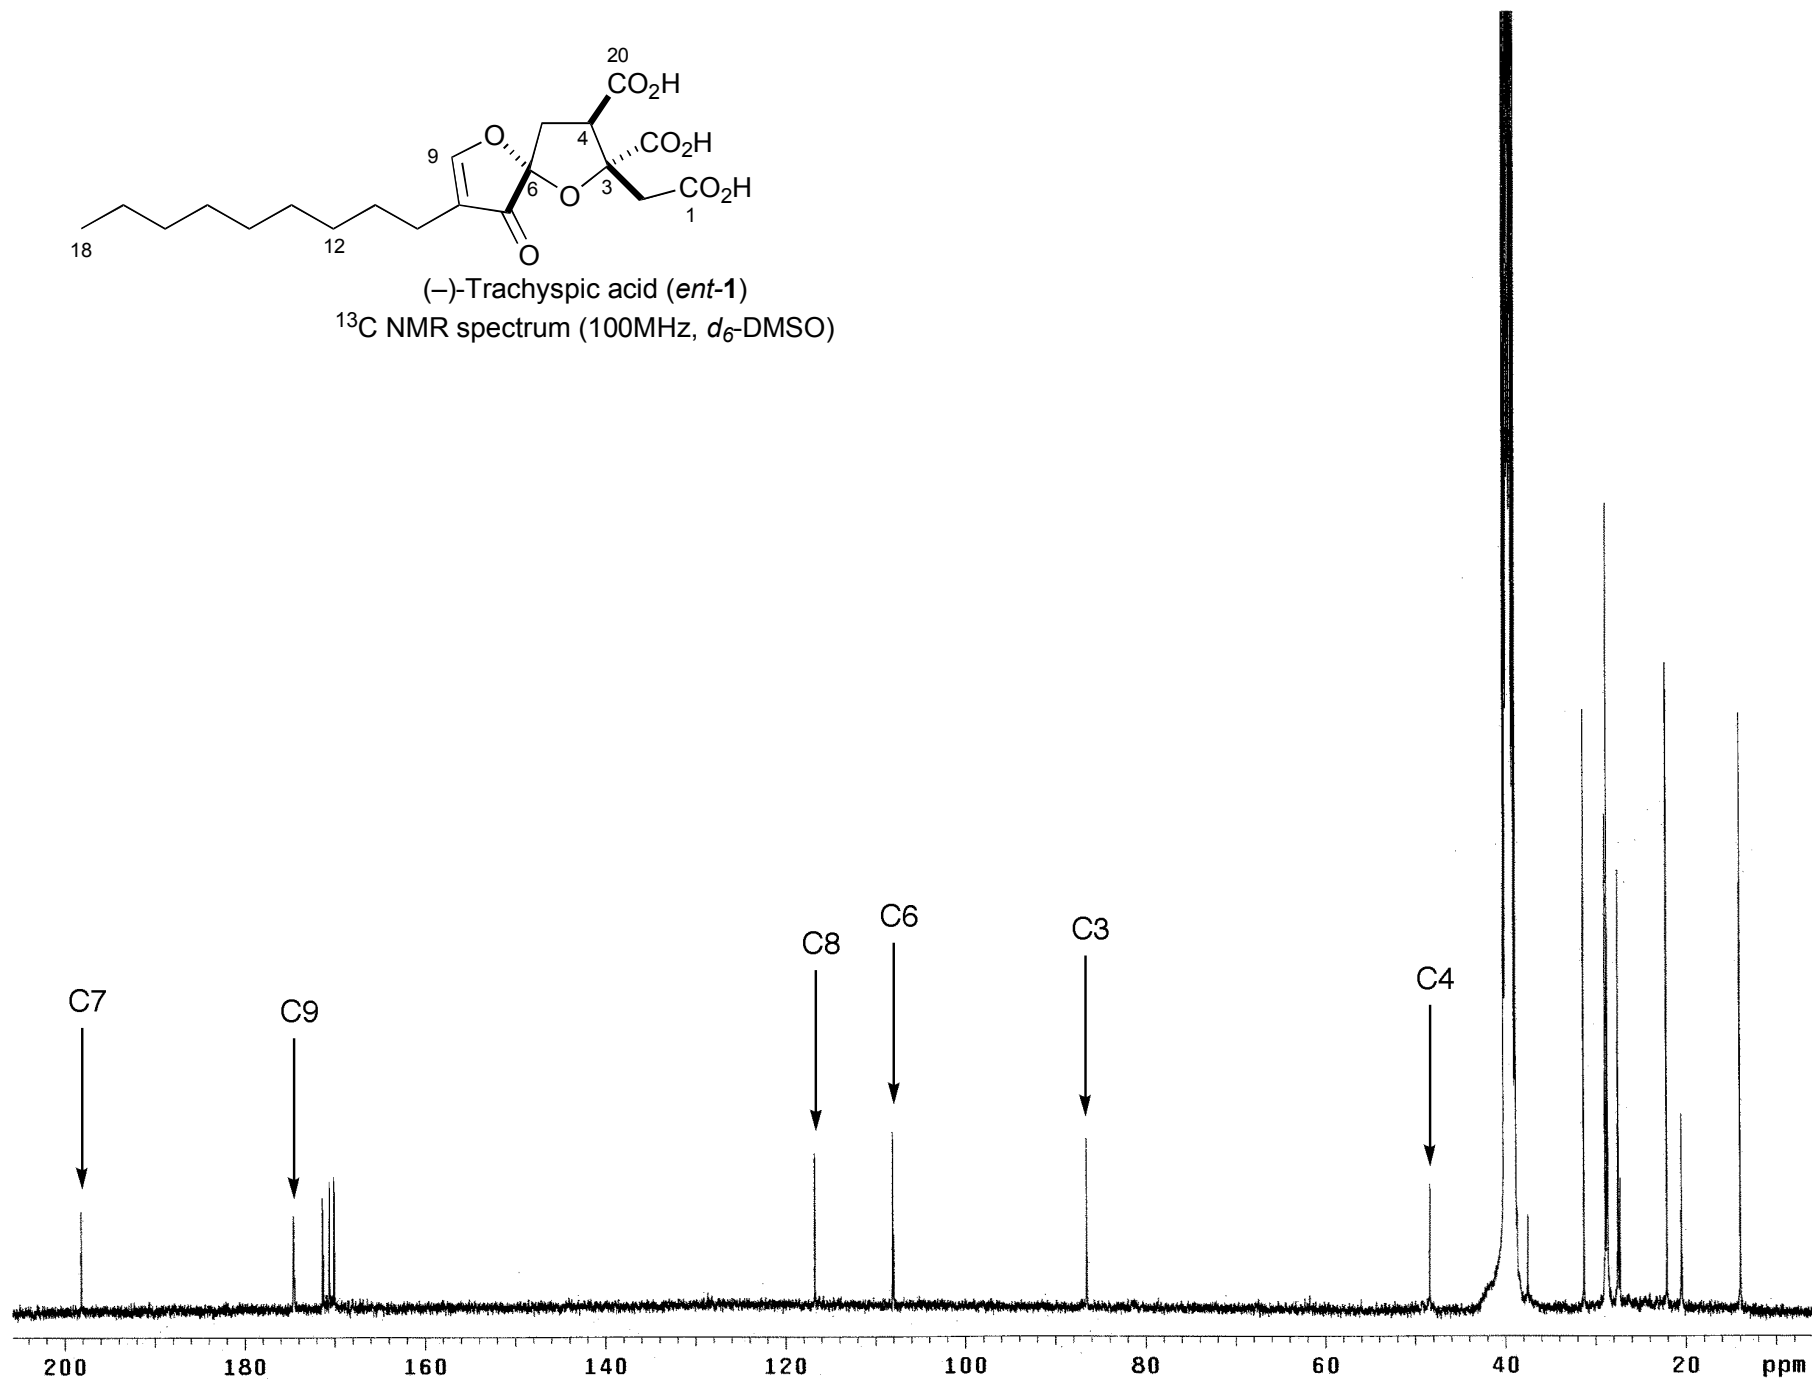



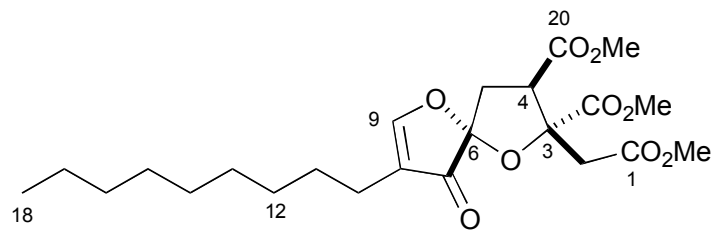

(-)-Trachyspic acid trimethyl ester (*ent*-**25**)  
<sup>1</sup>H NMR spectrum (400MHz, *d*<sub>6</sub>-DMSO)

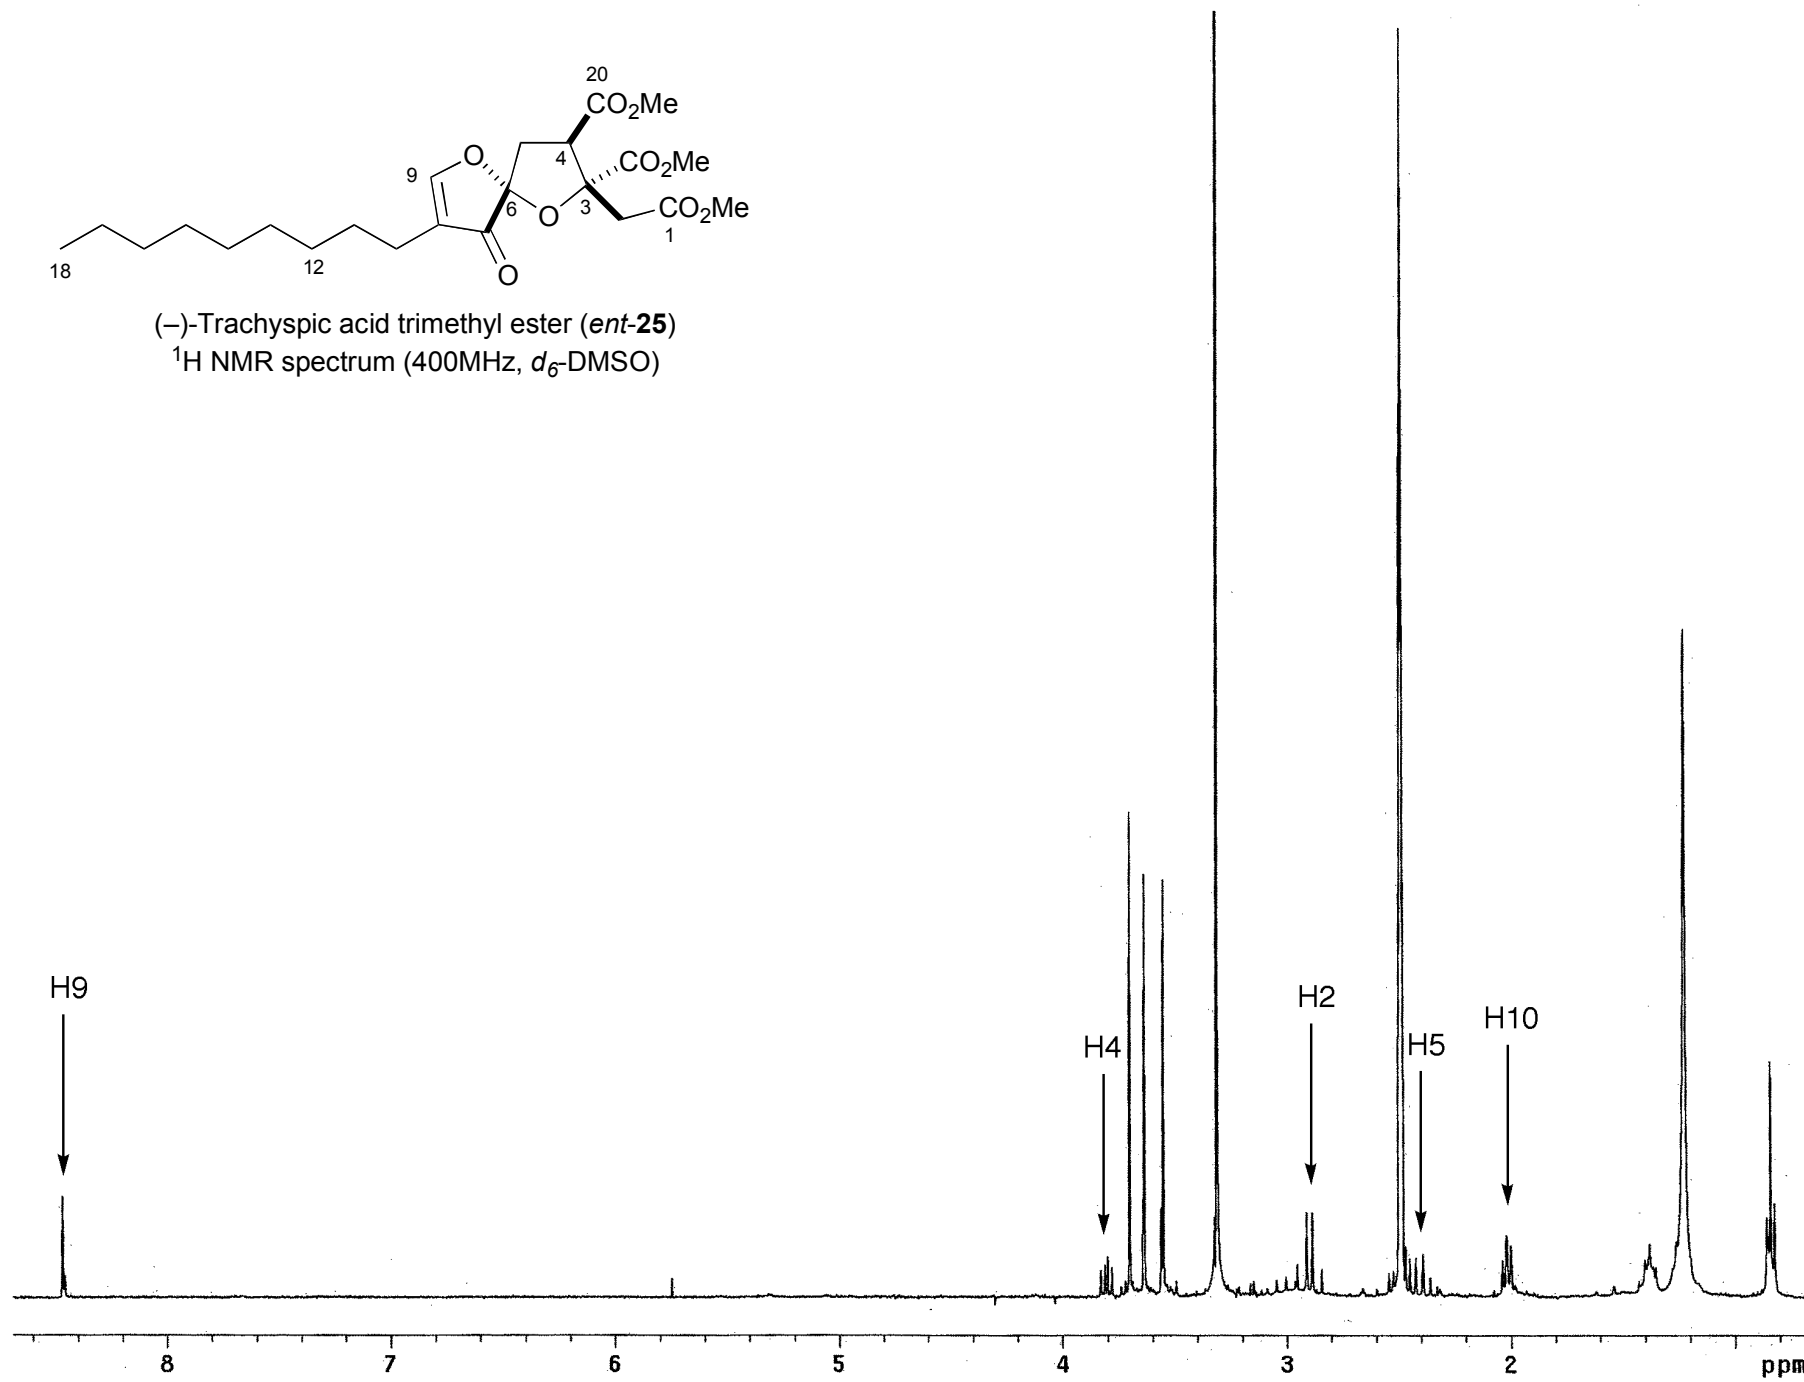

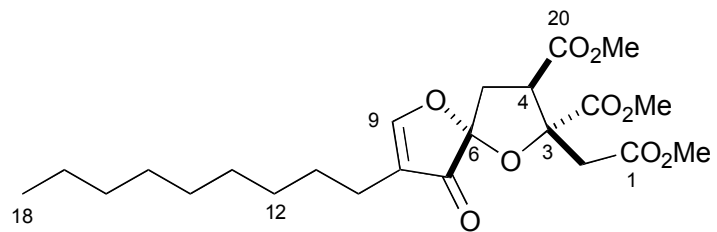

(-)-Trachyspic acid trimethyl ester (*ent*-**25**)  
<sup>13</sup>C NMR spectrum (100MHz, *d*<sub>6</sub>-DMSO)

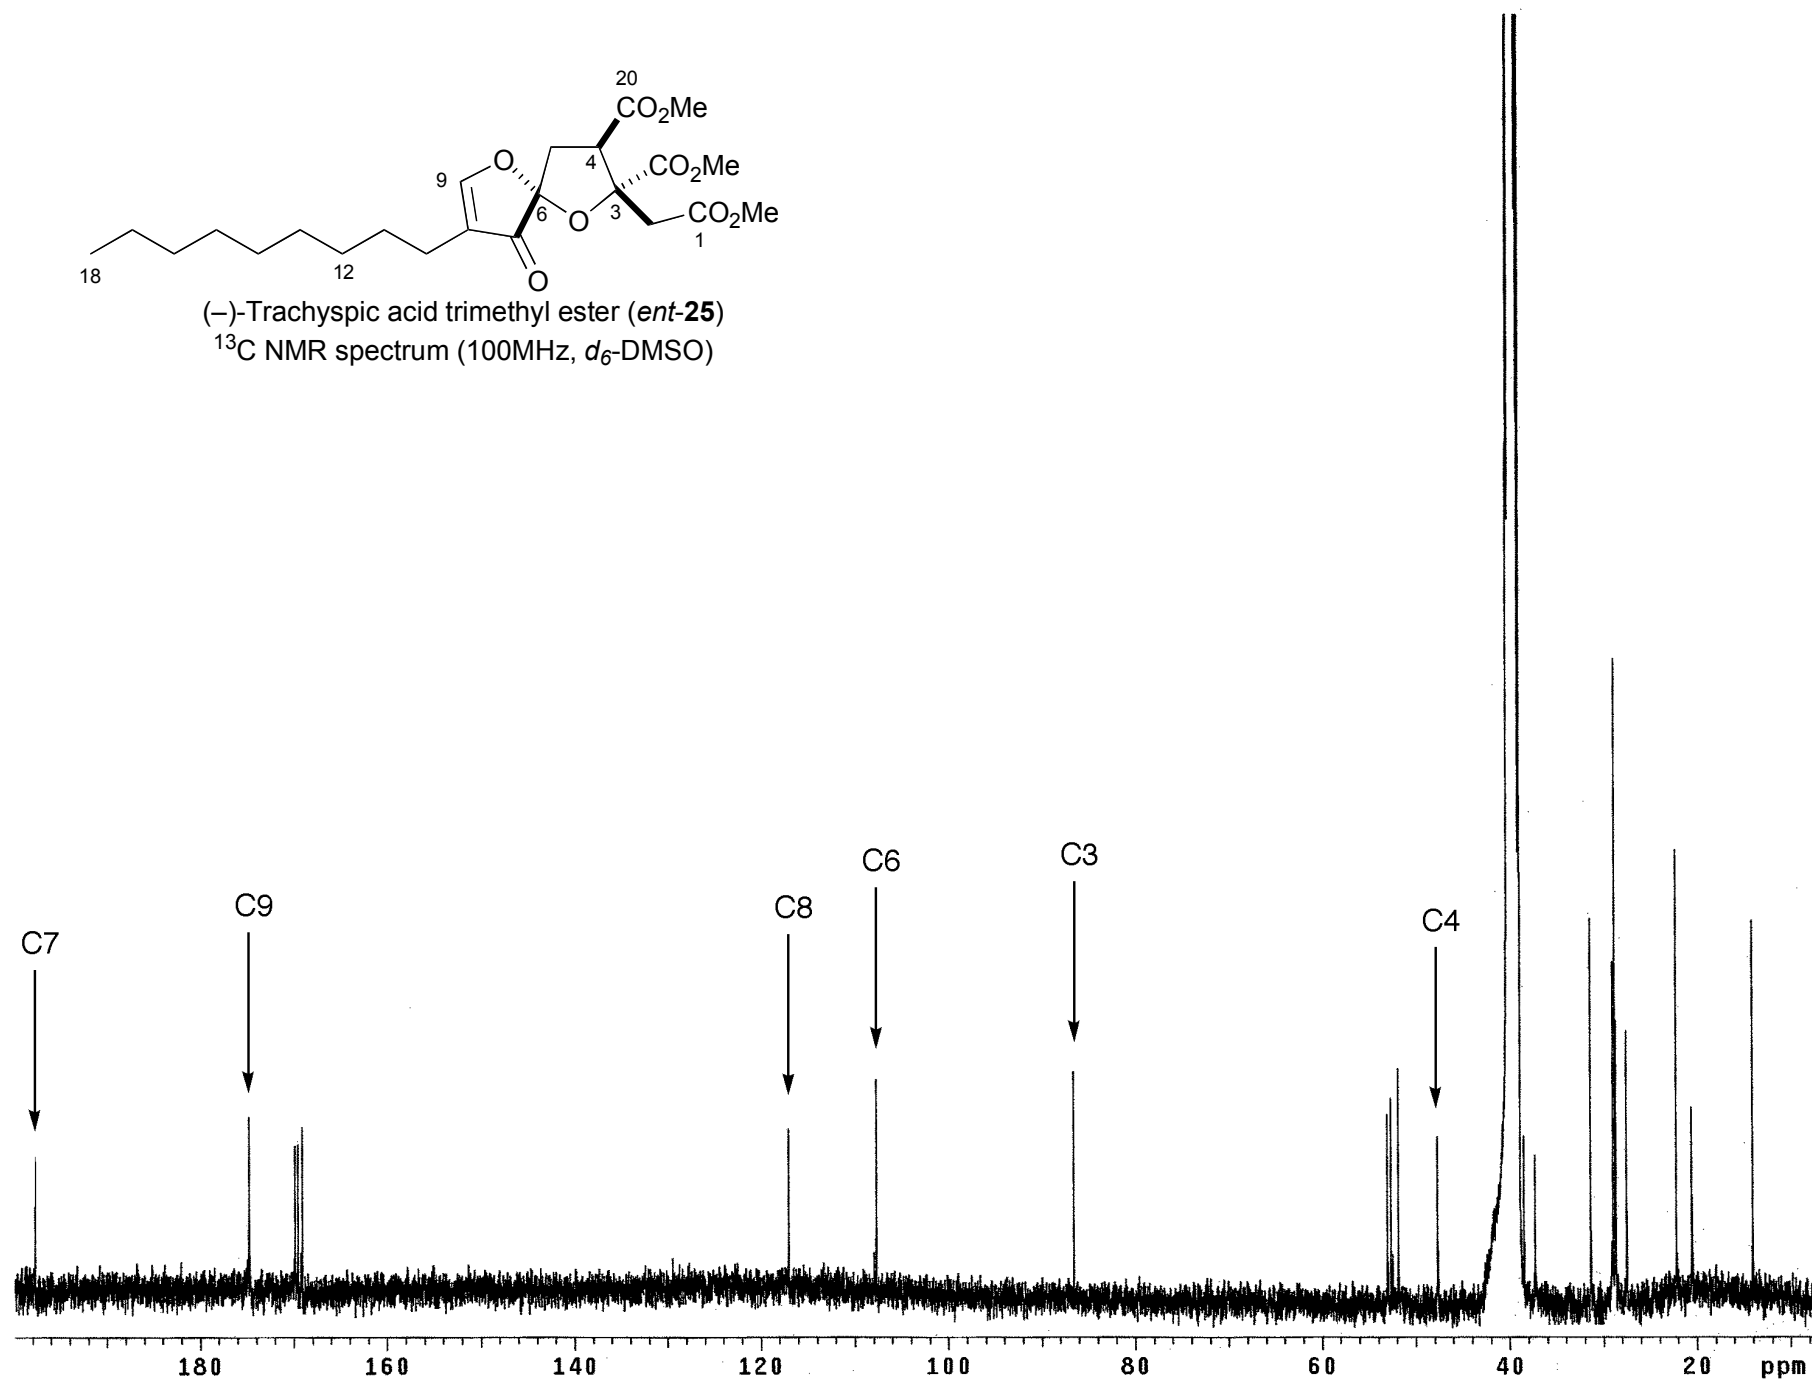

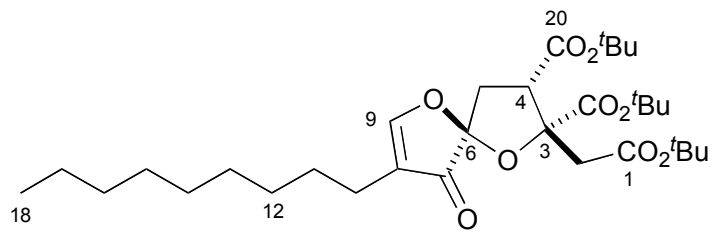

(-)-3-*epi*-Trachyspic acid tri-*t*-butyl ester (**31**)

<sup>1</sup>H NMR spectrum (400MHz, CDCl<sub>3</sub>)

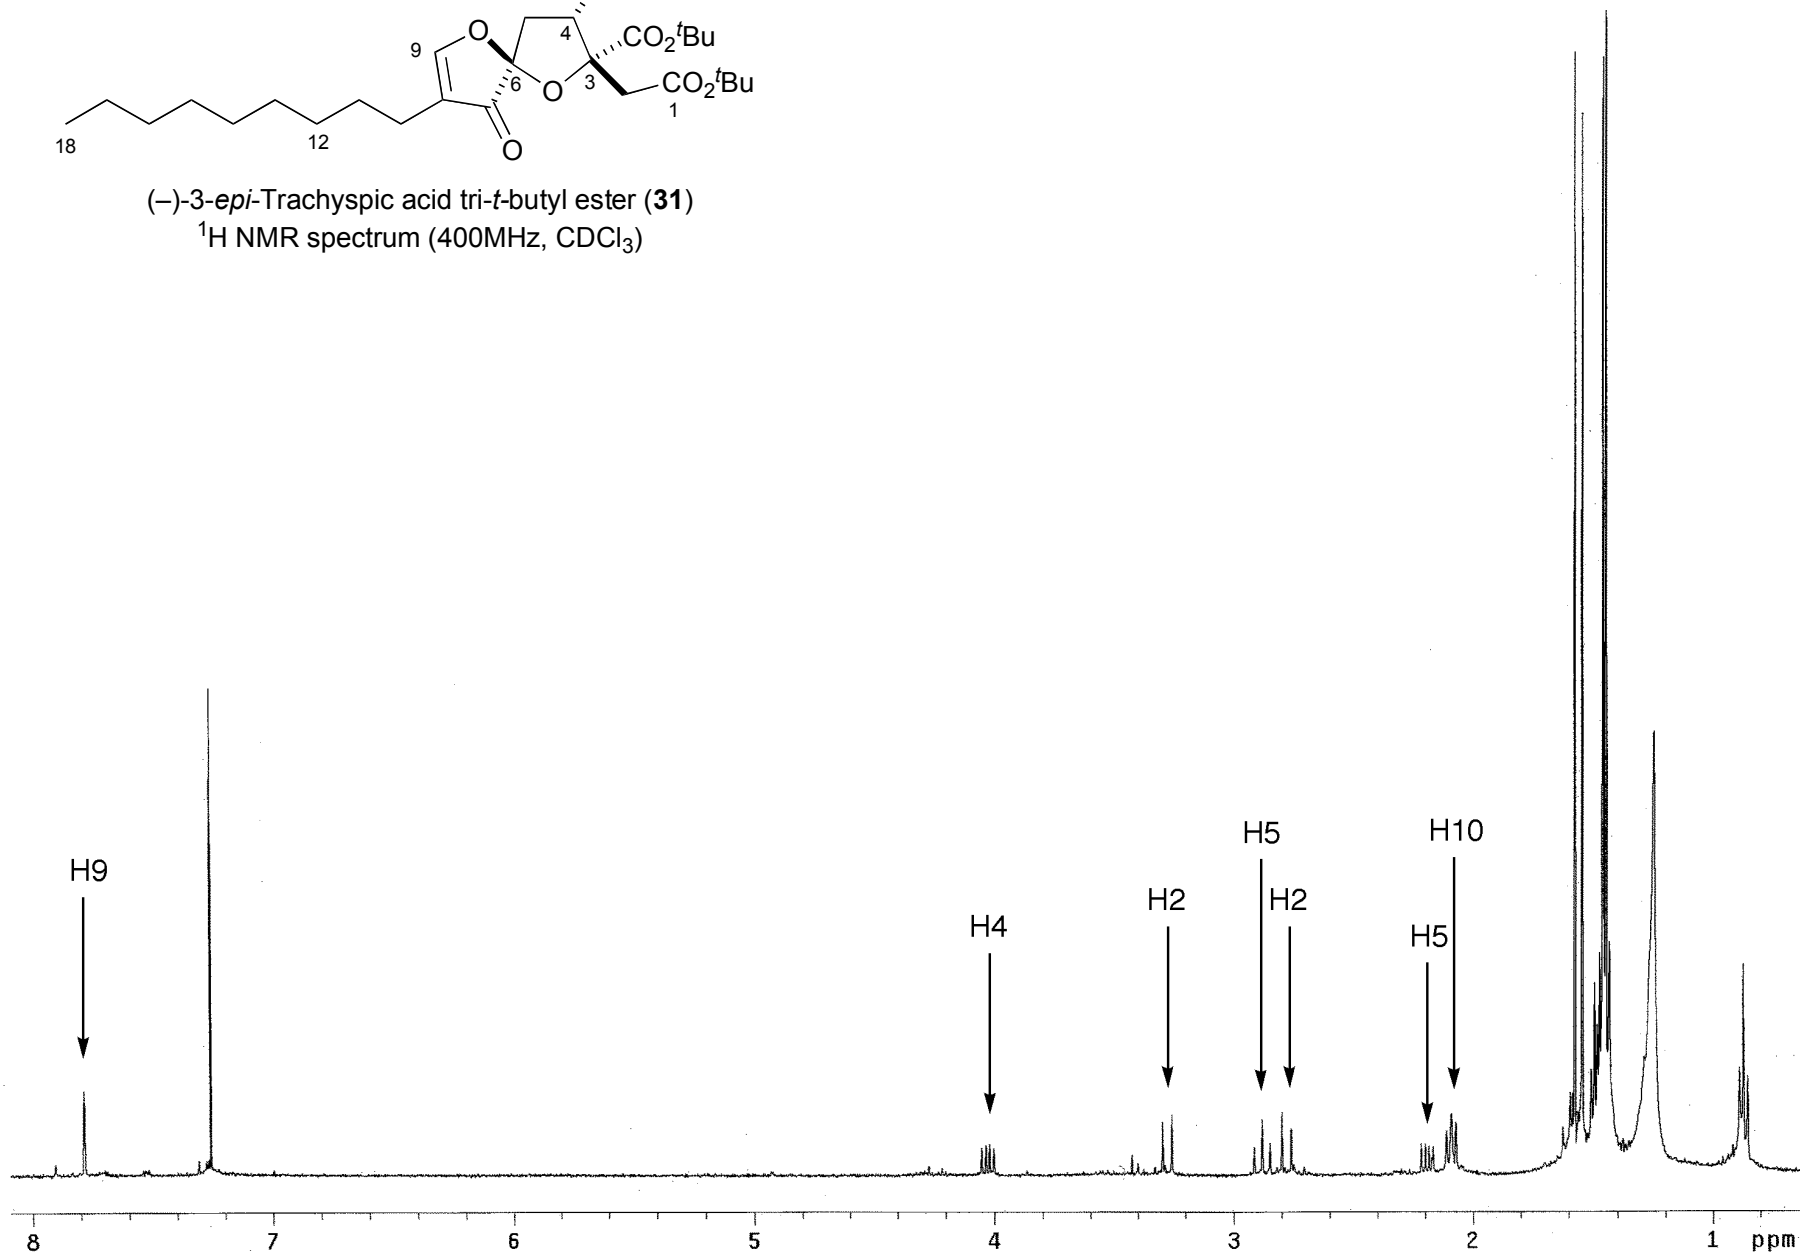

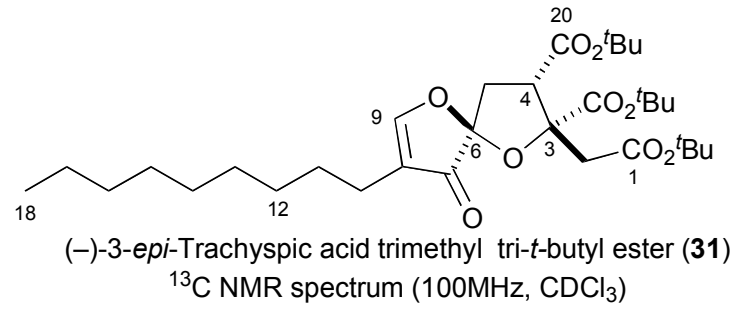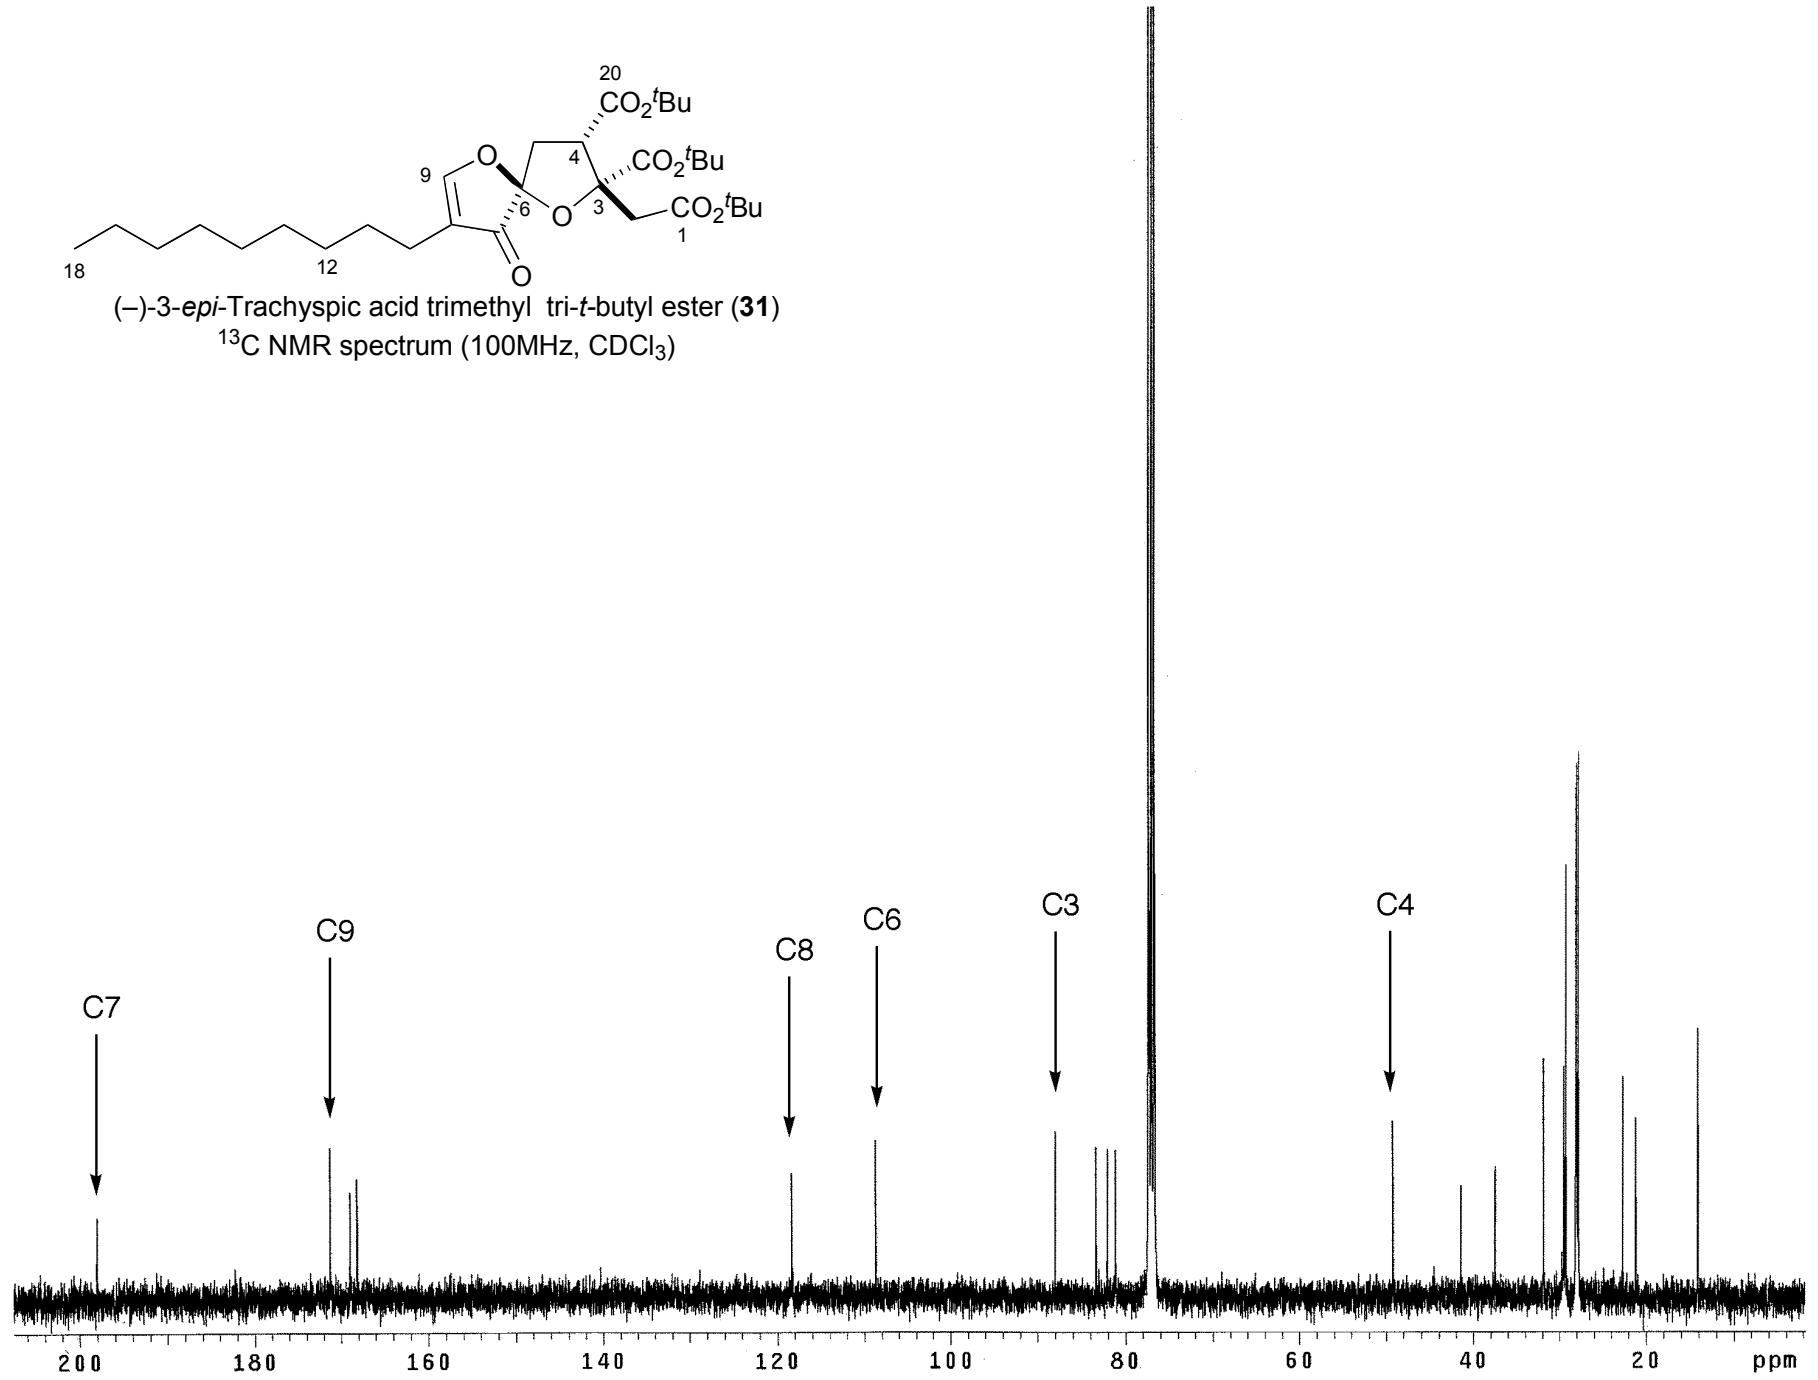

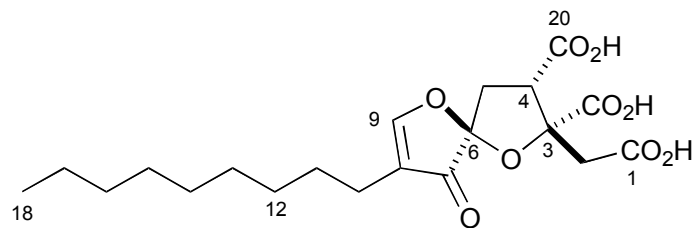

(+)-3-*epi*-Trachyspic acid (**28**)  
<sup>1</sup>H NMR spectrum (400MHz, *d*<sub>6</sub>-DMSO)

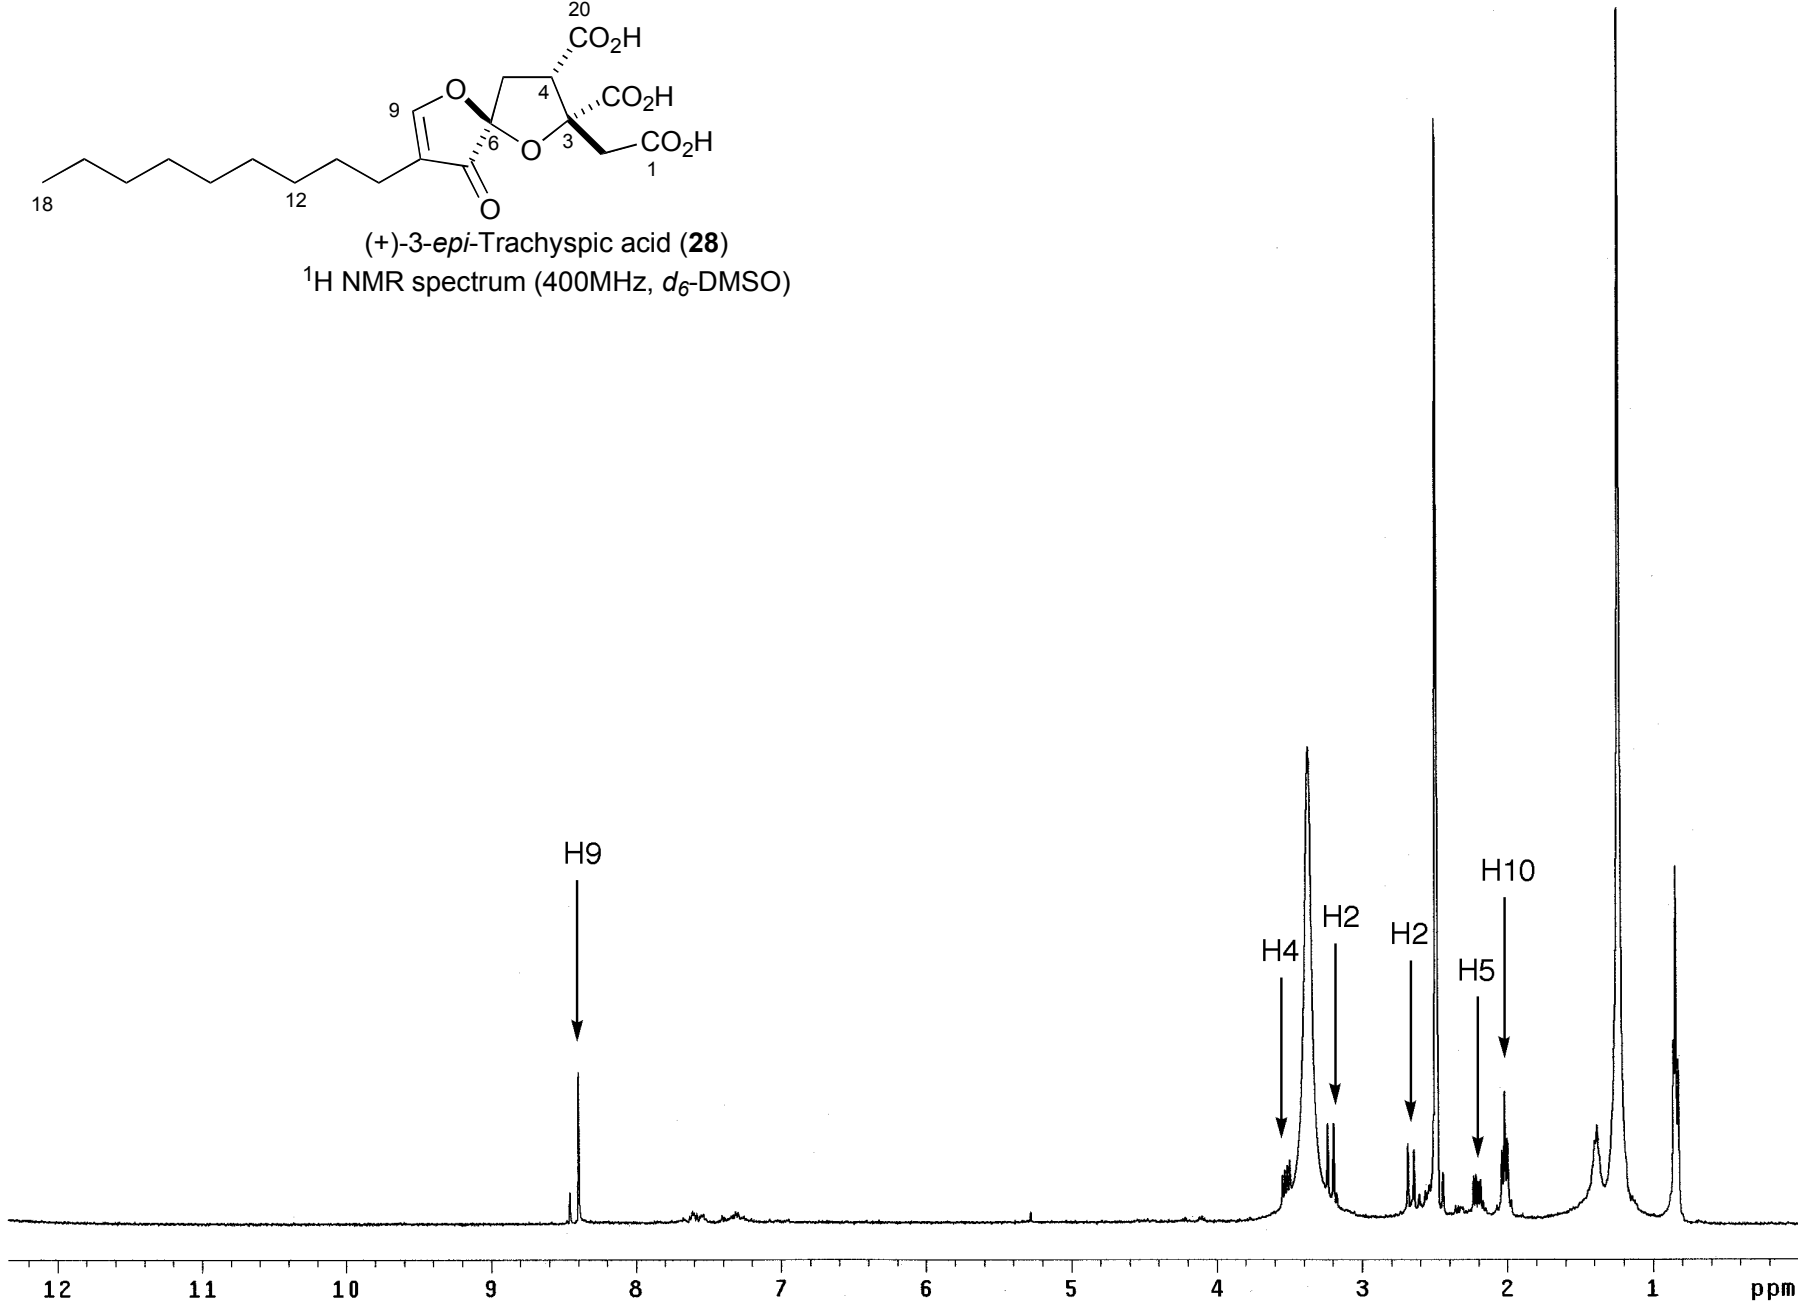

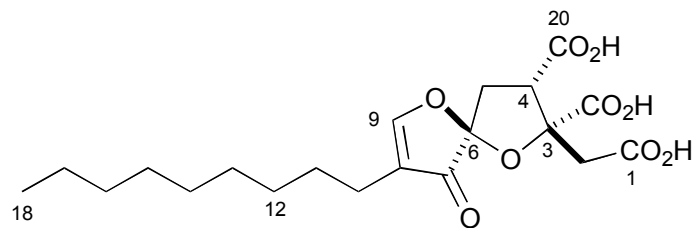

(+)-3-*epi*-Trachyspic acid (**28**)  
<sup>13</sup>C NMR spectrum (100MHz, *d*<sub>6</sub>-DMSO)

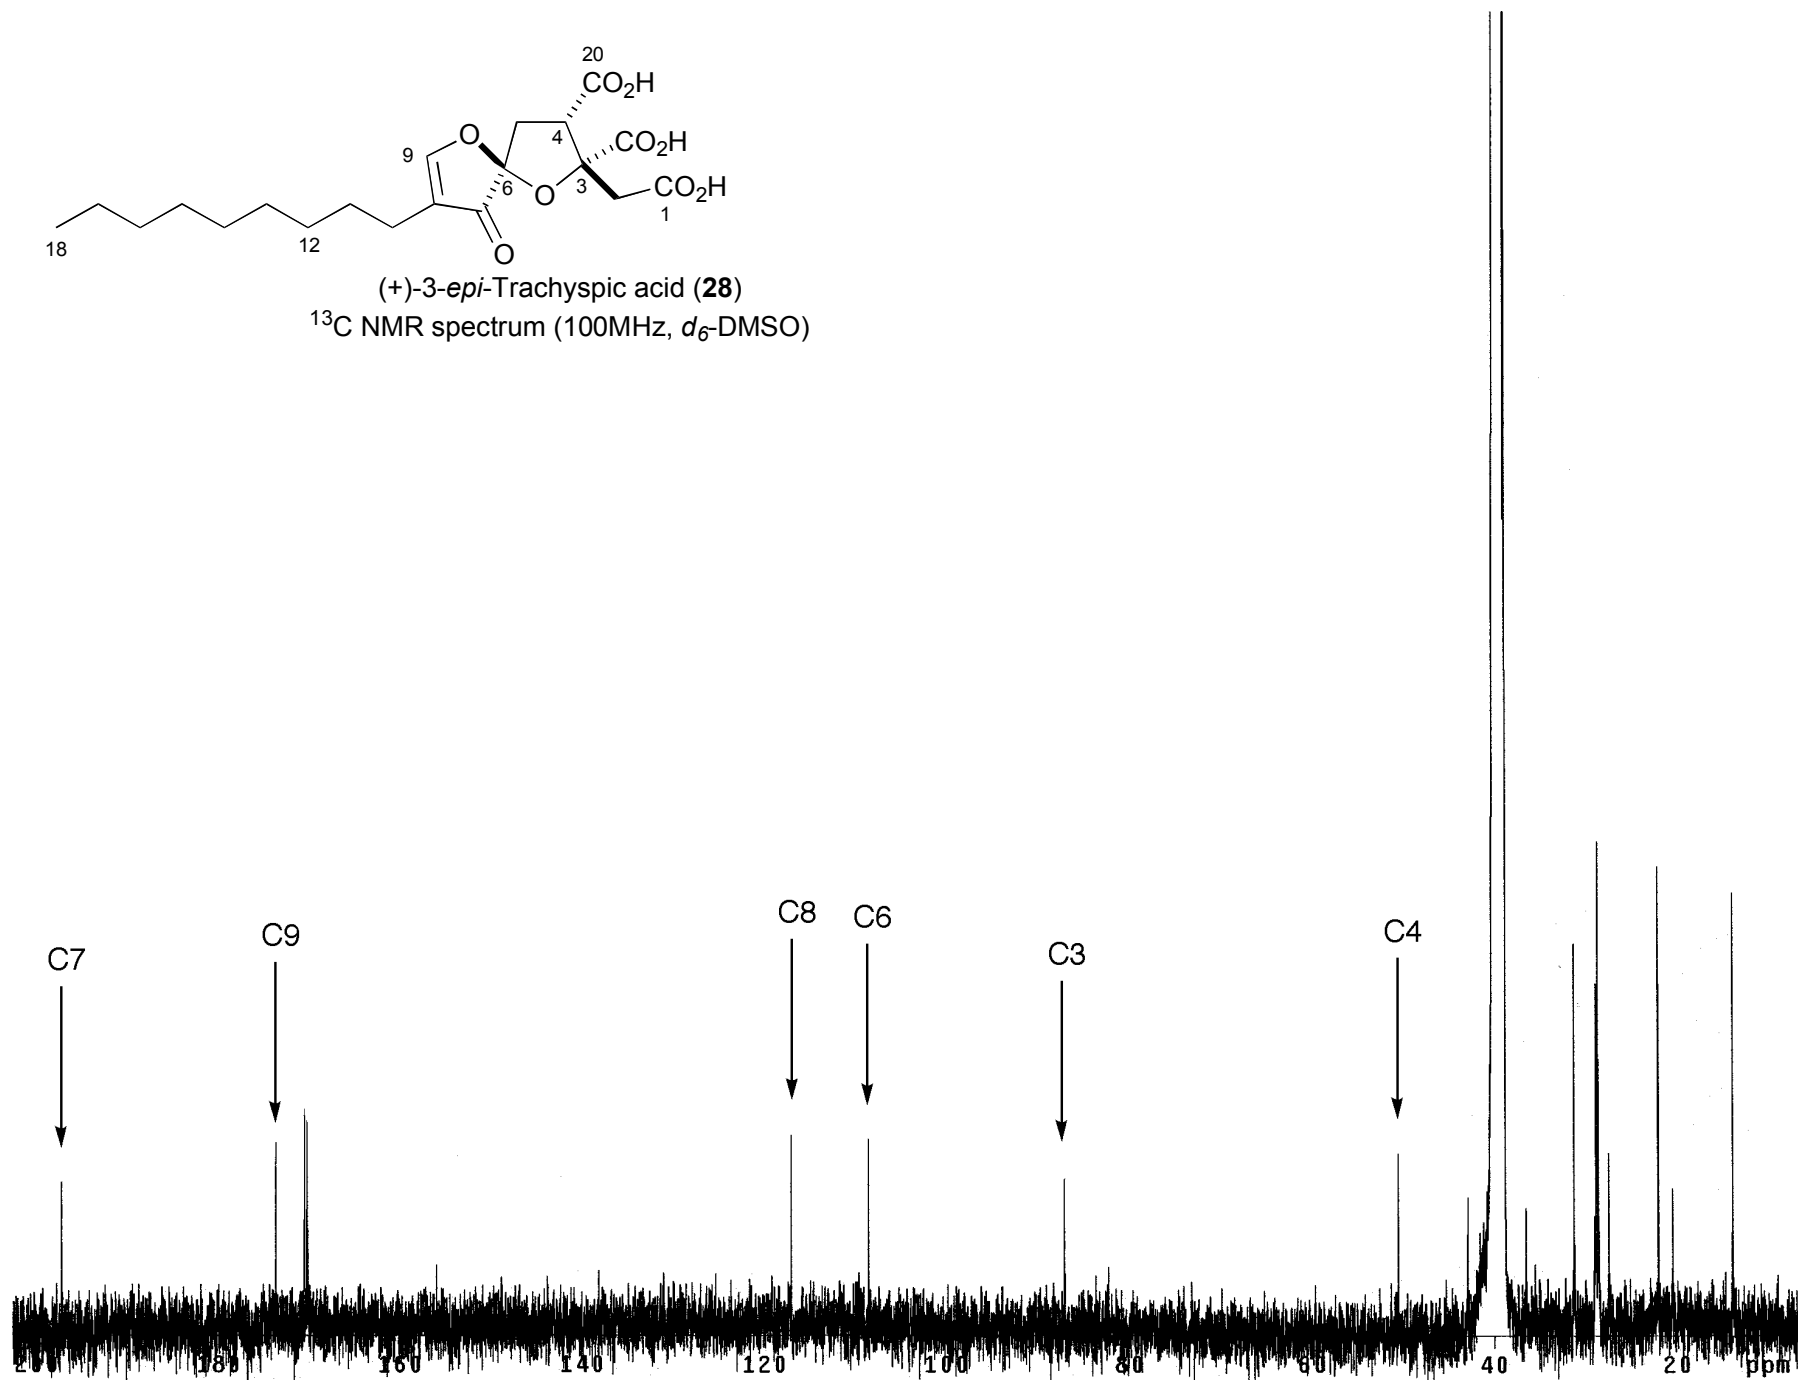

Supplement: b708594j.pdf [file b708594j.pdf]
